# Supplementary material
Source: ML conference proceedings conference paper supplement (https://openreview.net/forum?id=dwx3rjWGju)

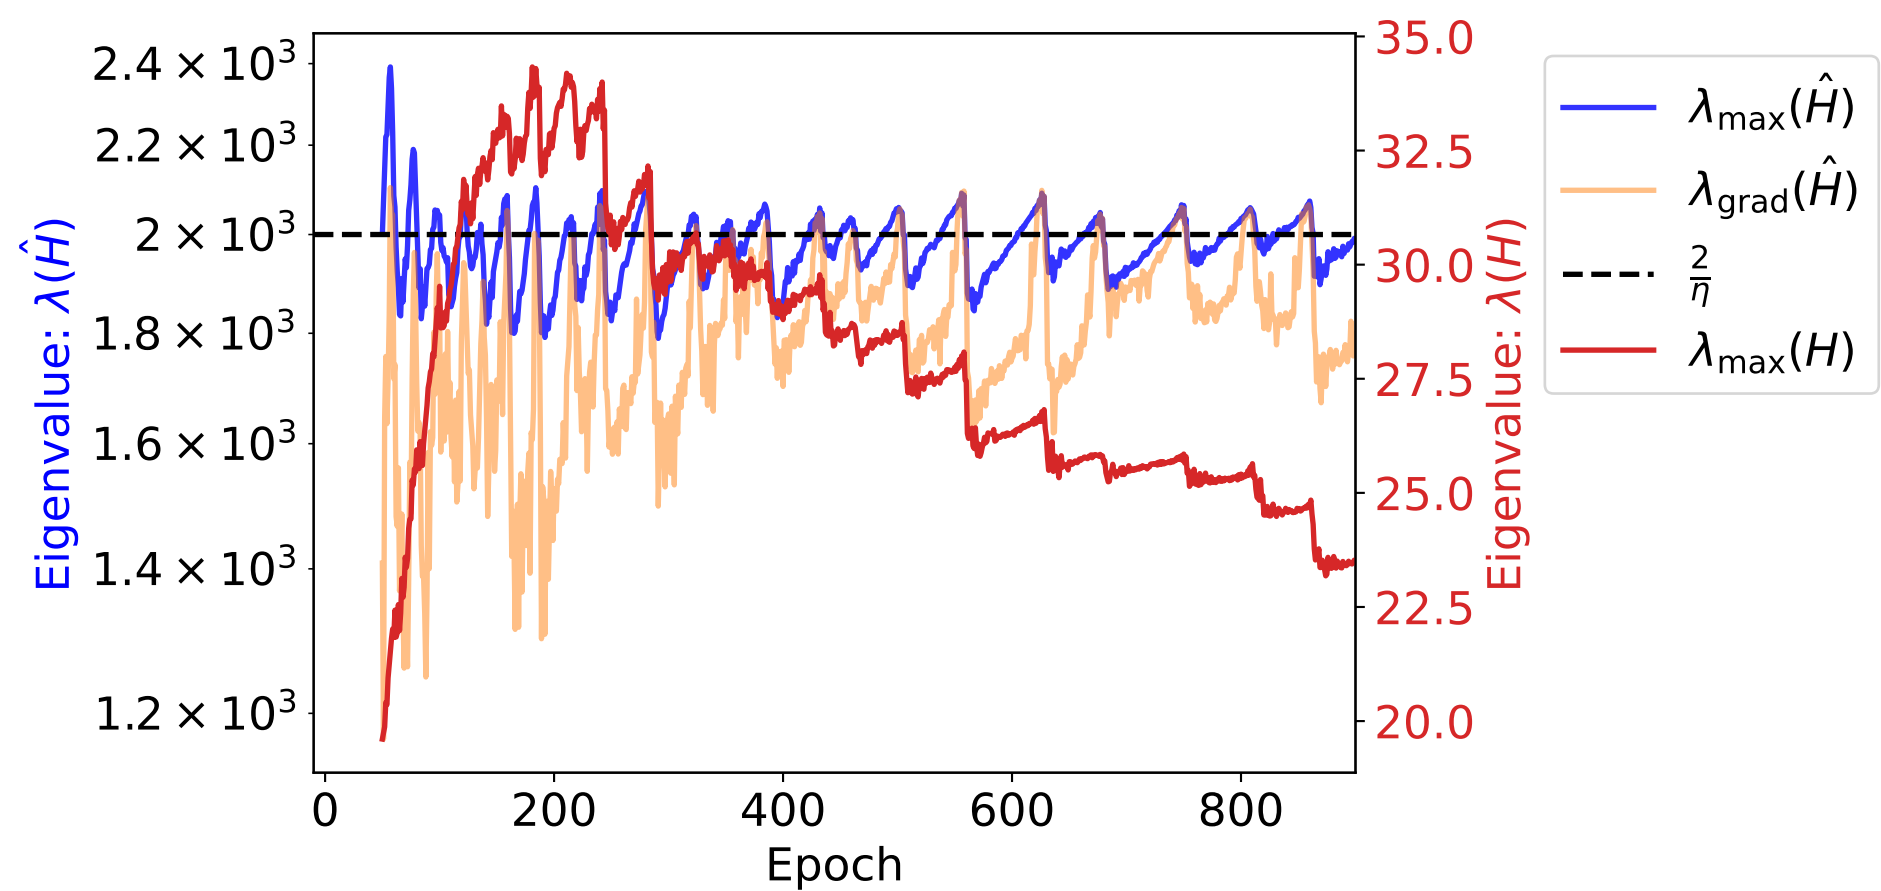

Supplement: supplementary_material [file lambda_max.pdf › Code/Adam_CNN_CIFAR10_1k/CNN_paper/lambda_max.pdf]

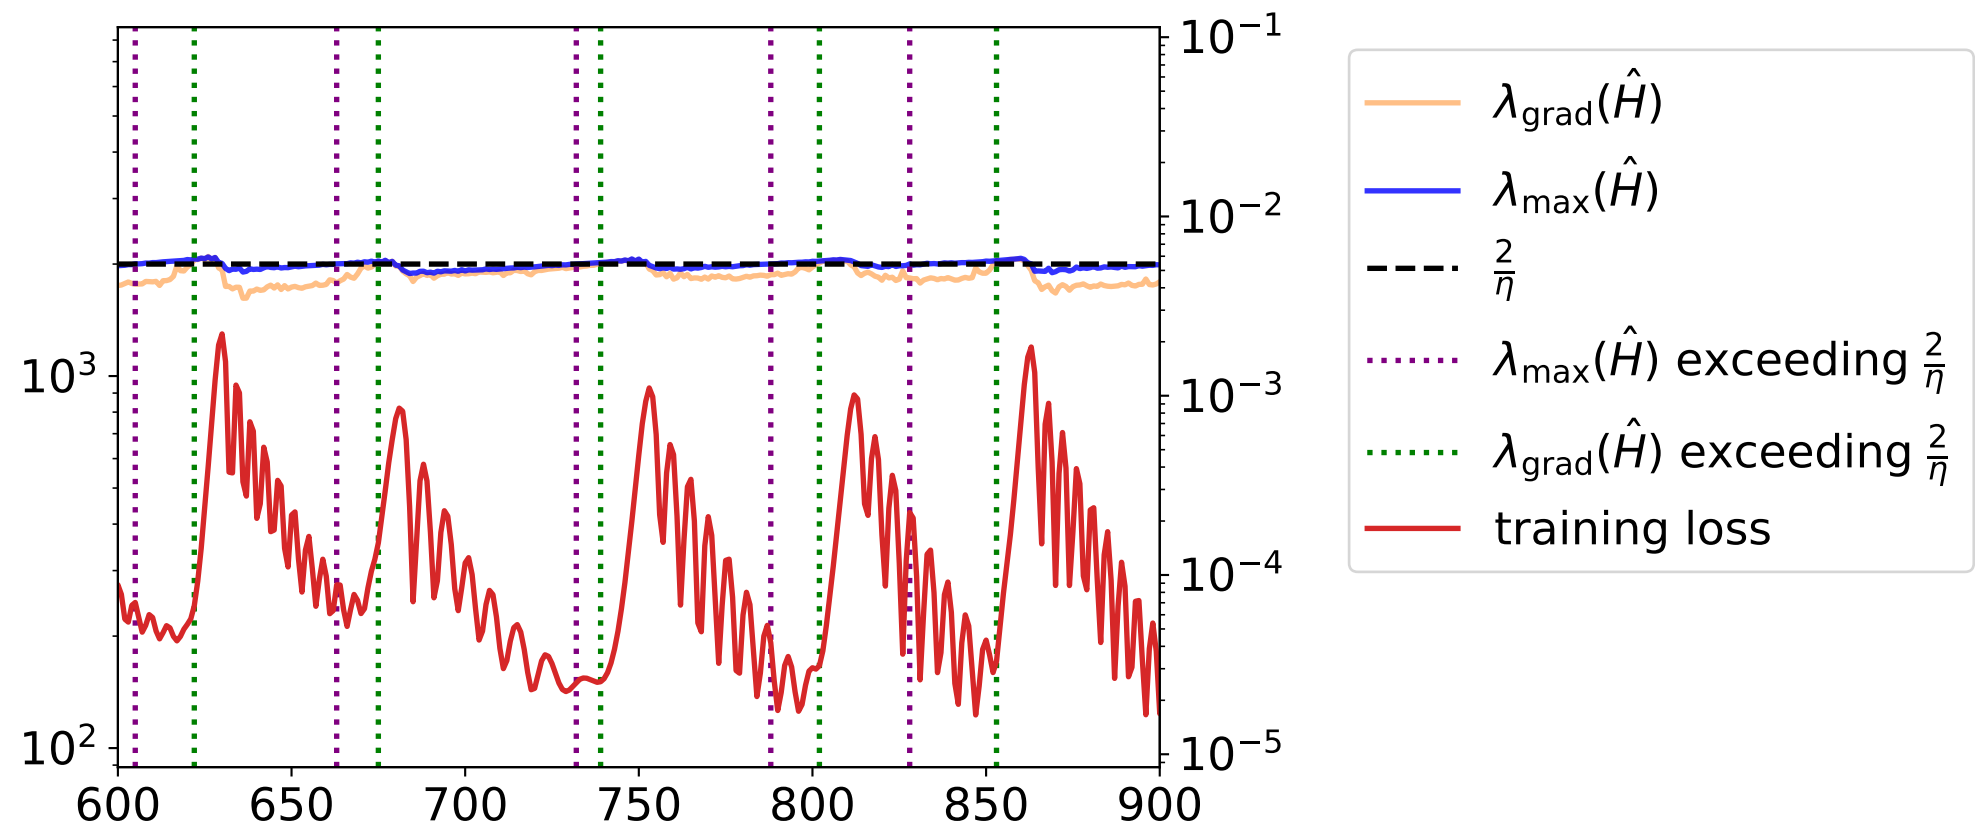

Supplement: supplementary_material [file lambda_max_zoom_in.pdf › Code/Adam_CNN_CIFAR10_1k/CNN_paper/lambda_max_zoom_in.pdf]

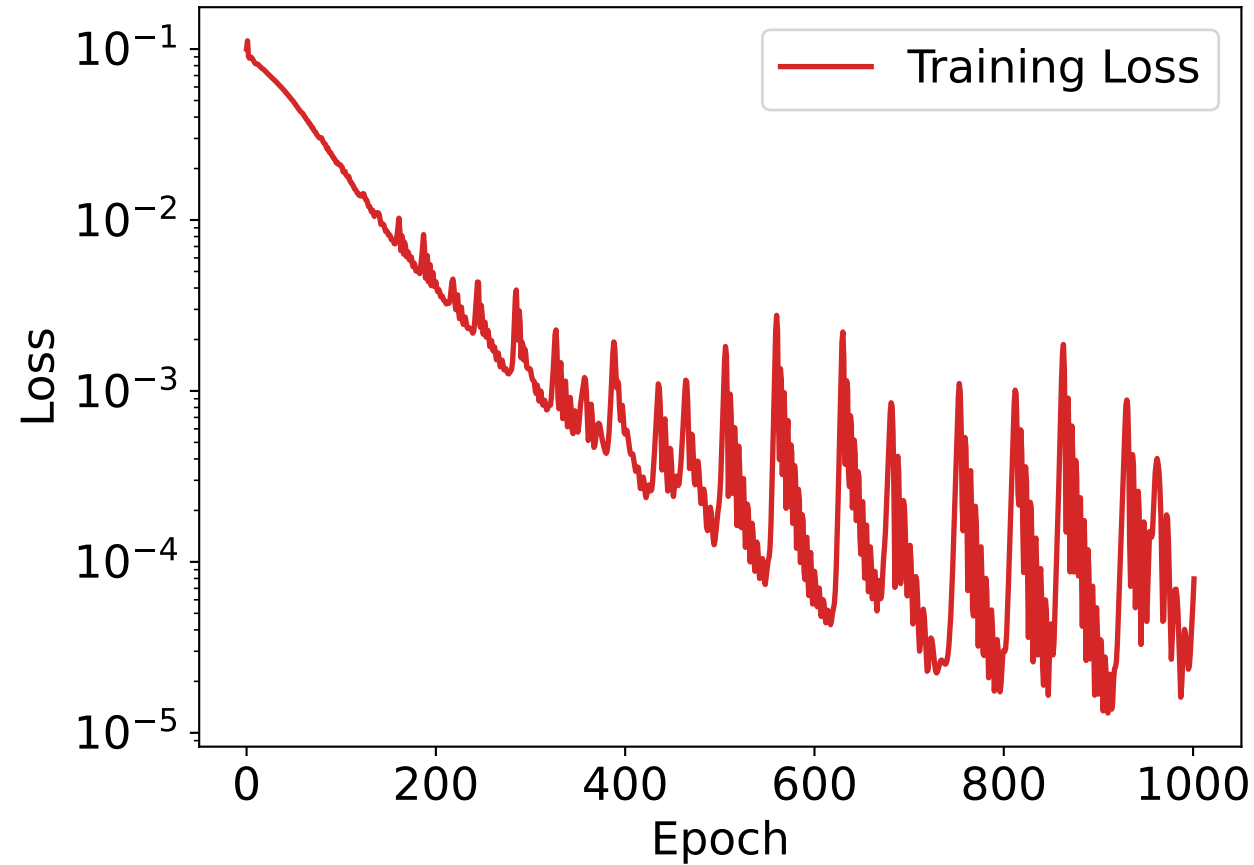

Supplement: supplementary_material [file loss.pdf › Code/Adam_CNN_CIFAR10_1k/CNN_paper/loss.pdf]

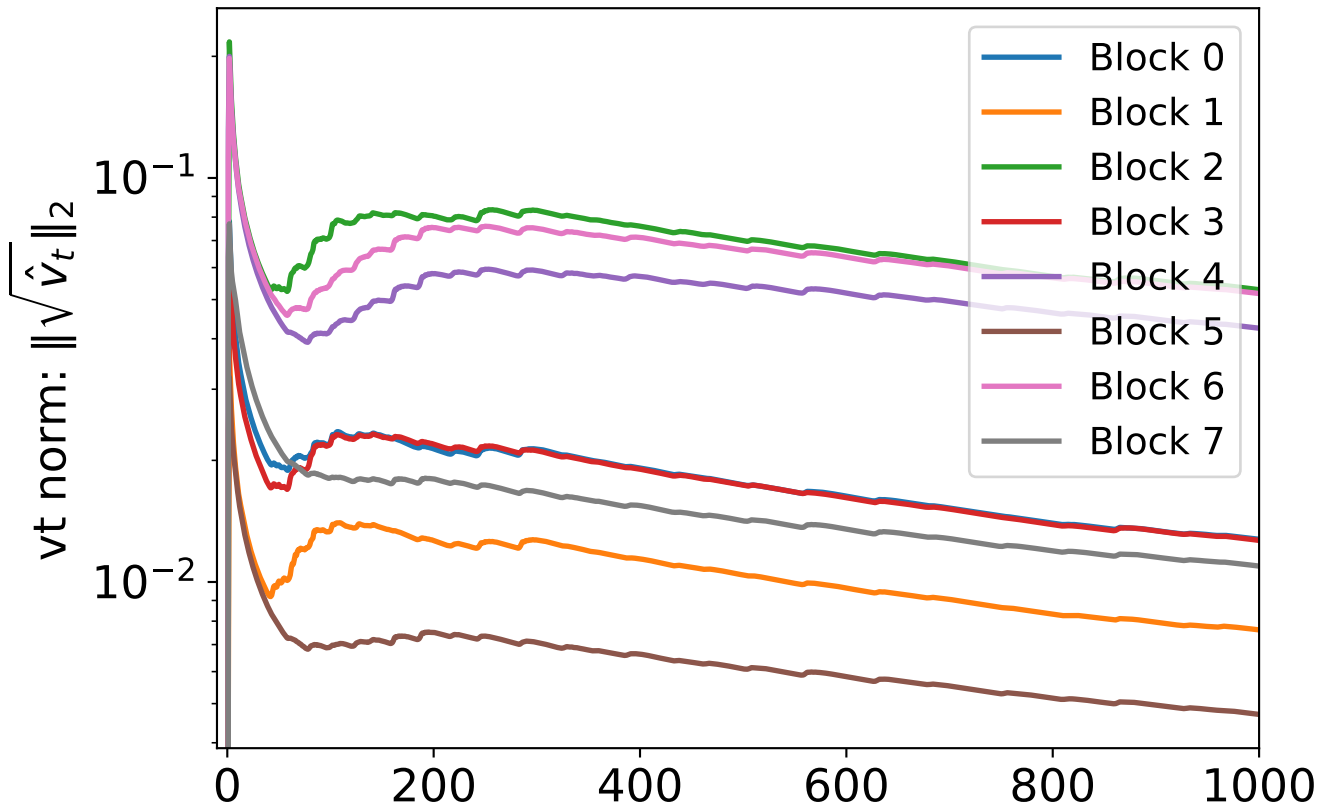

Supplement: supplementary_material [file vt_norm.pdf › Code/Adam_CNN_CIFAR10_1k/CNN_paper/vt_norm.pdf]

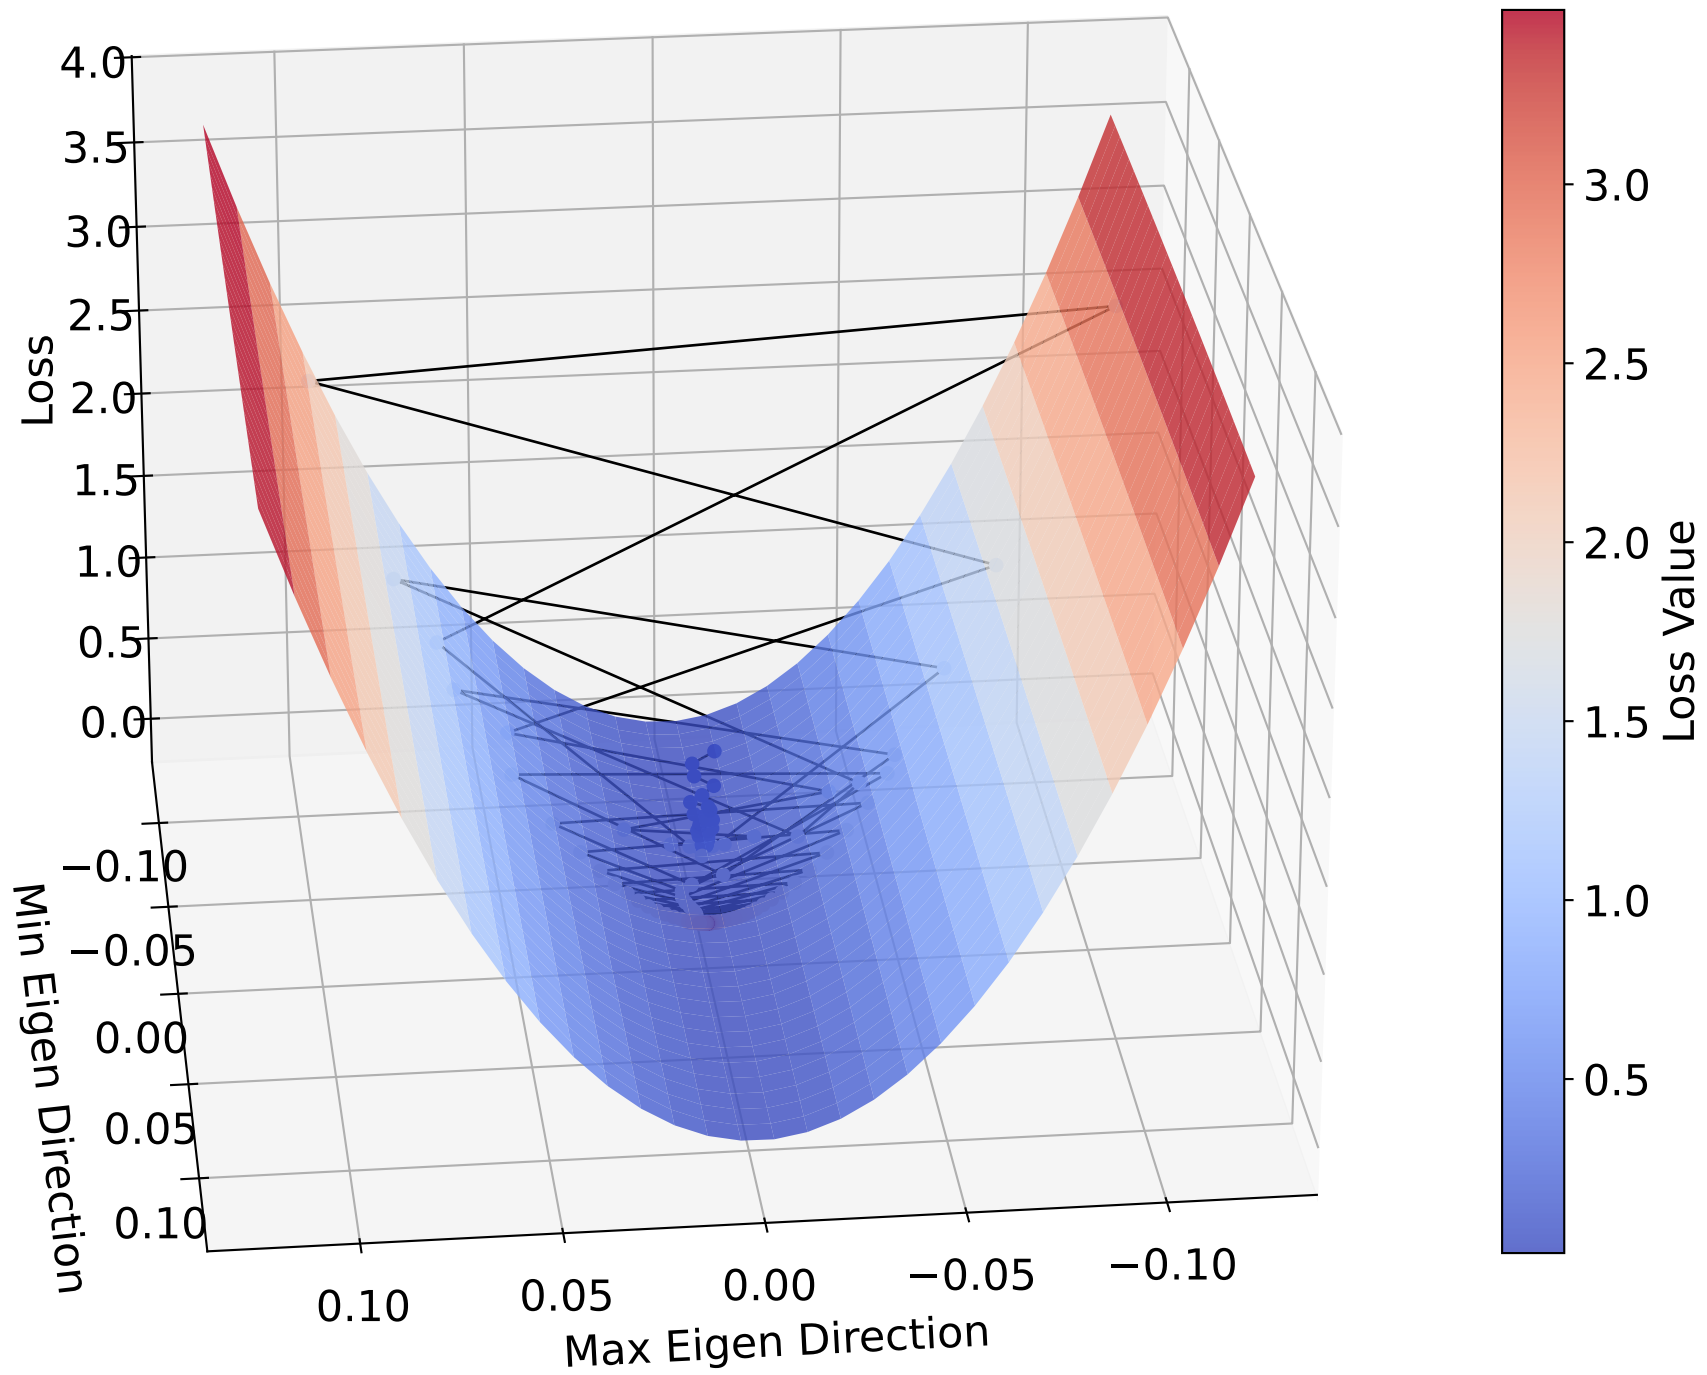

Supplement: supplementary_material [file 3D_plot_loss_landscape_adam.pdf › Code/Adam_two_layer_net_50_dim/analysis/3D_plot_loss_landscape_adam.pdf]

Min Eigen Direction

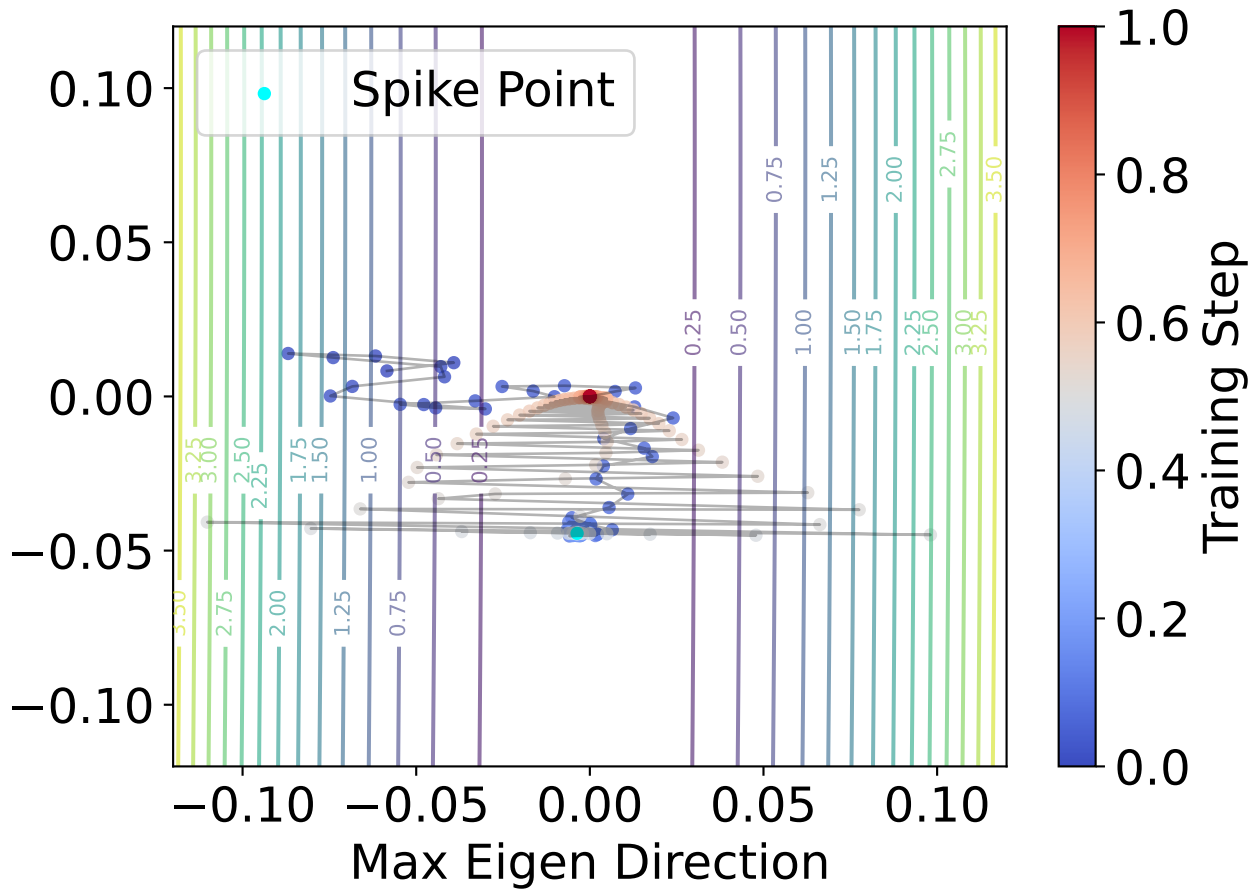

Supplement: supplementary_material [file contour_loss_landscape_adam.pdf › Code/Adam_two_layer_net_50_dim/analysis/contour_loss_landscape_adam.pdf]

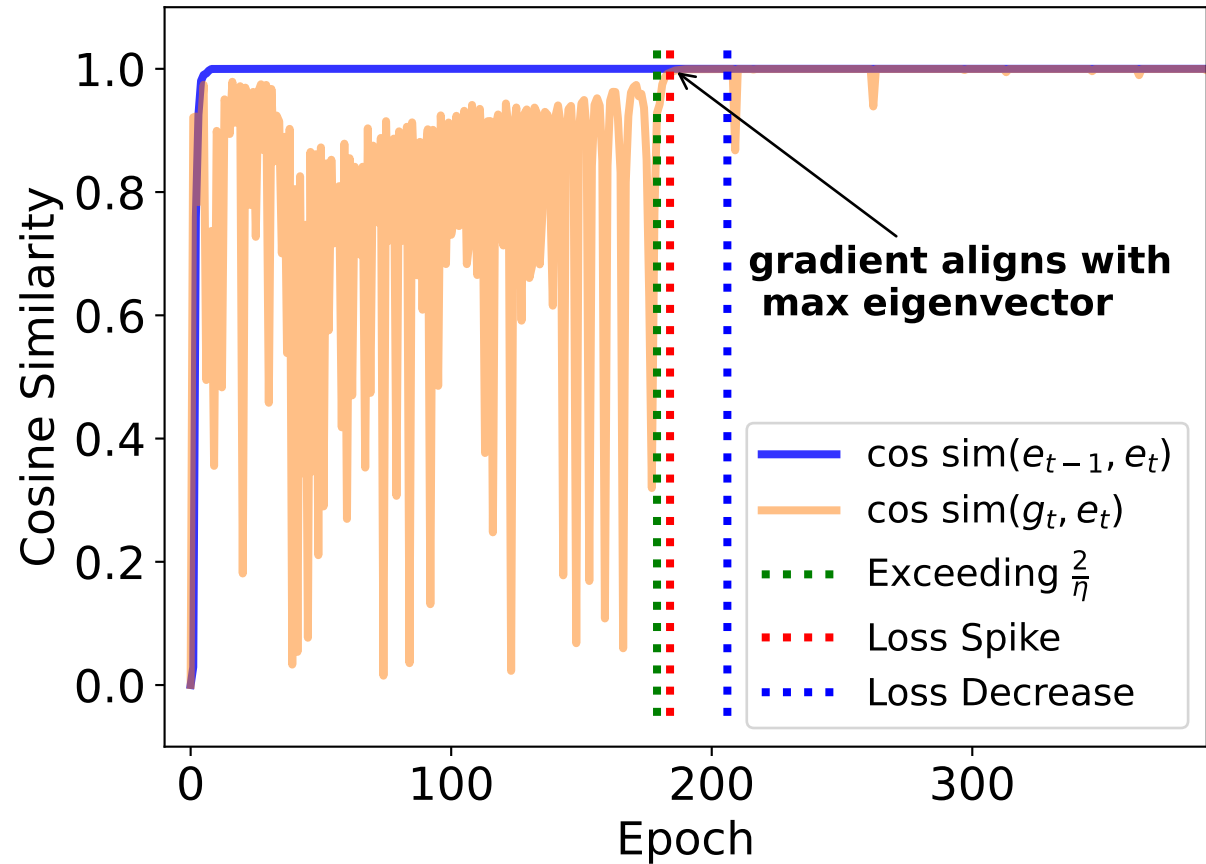

Supplement: supplementary_material [file cosine_similarity.pdf › Code/Adam_two_layer_net_50_dim/analysis/cosine_similarity.pdf]

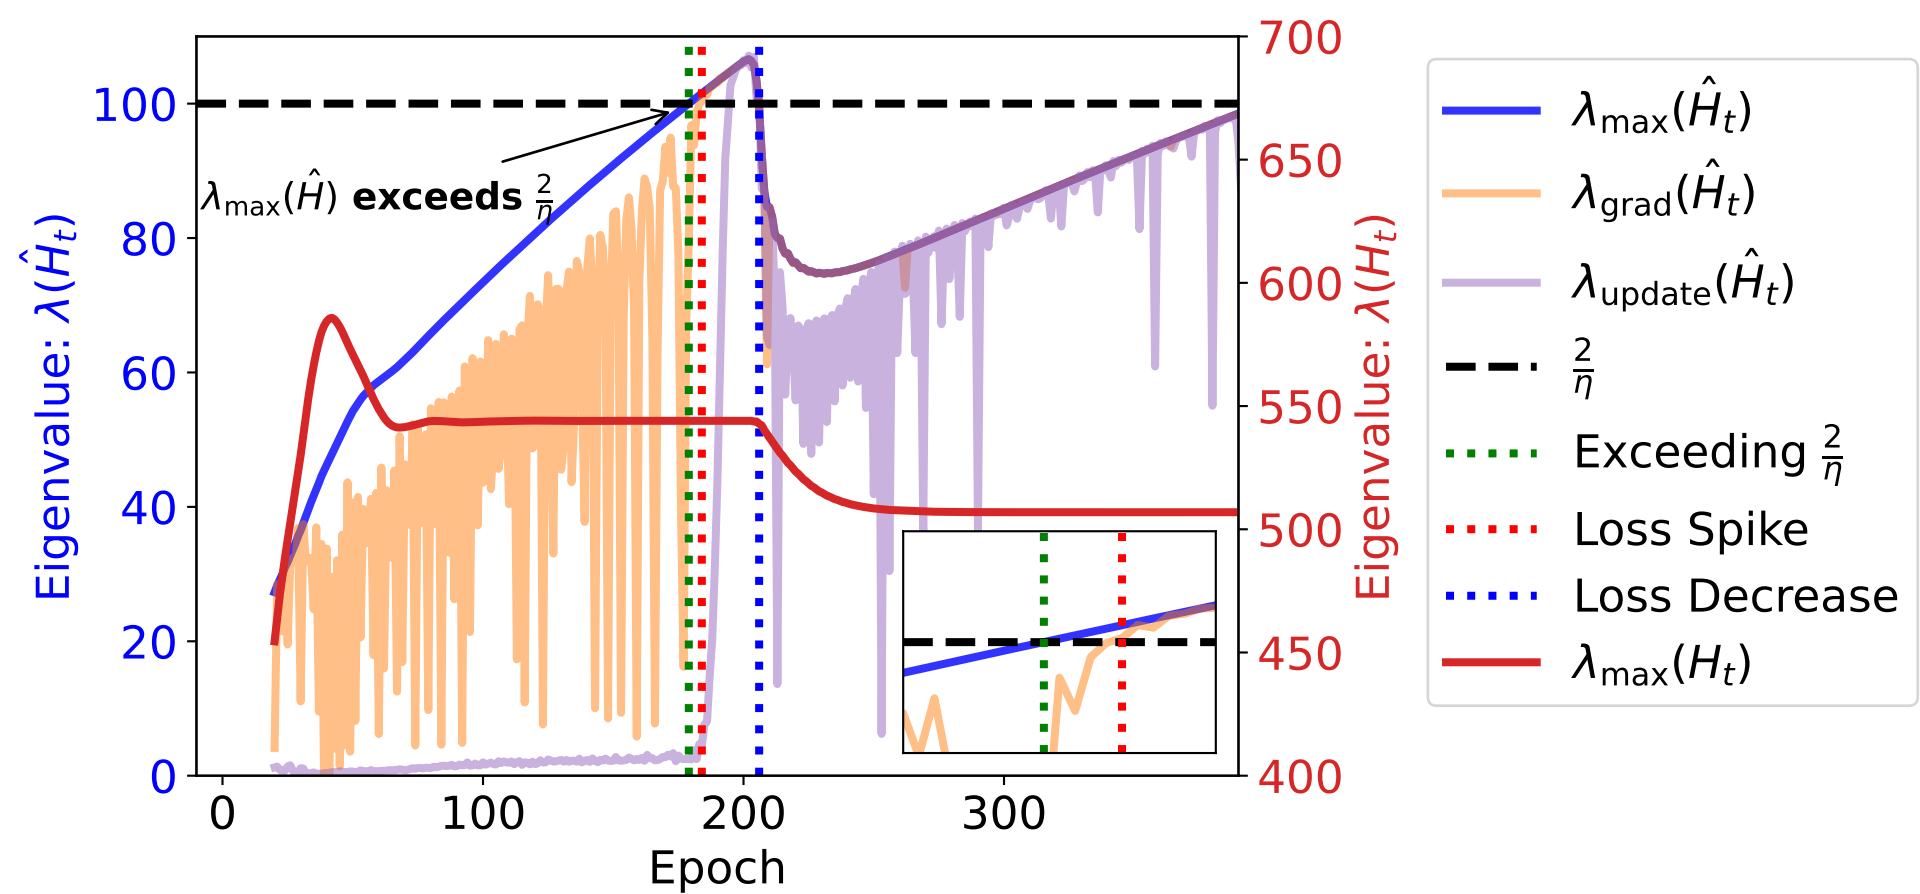

Supplement: supplementary_material [file lambda_max.pdf › Code/Adam_two_layer_net_50_dim/analysis/lambda_max.pdf]

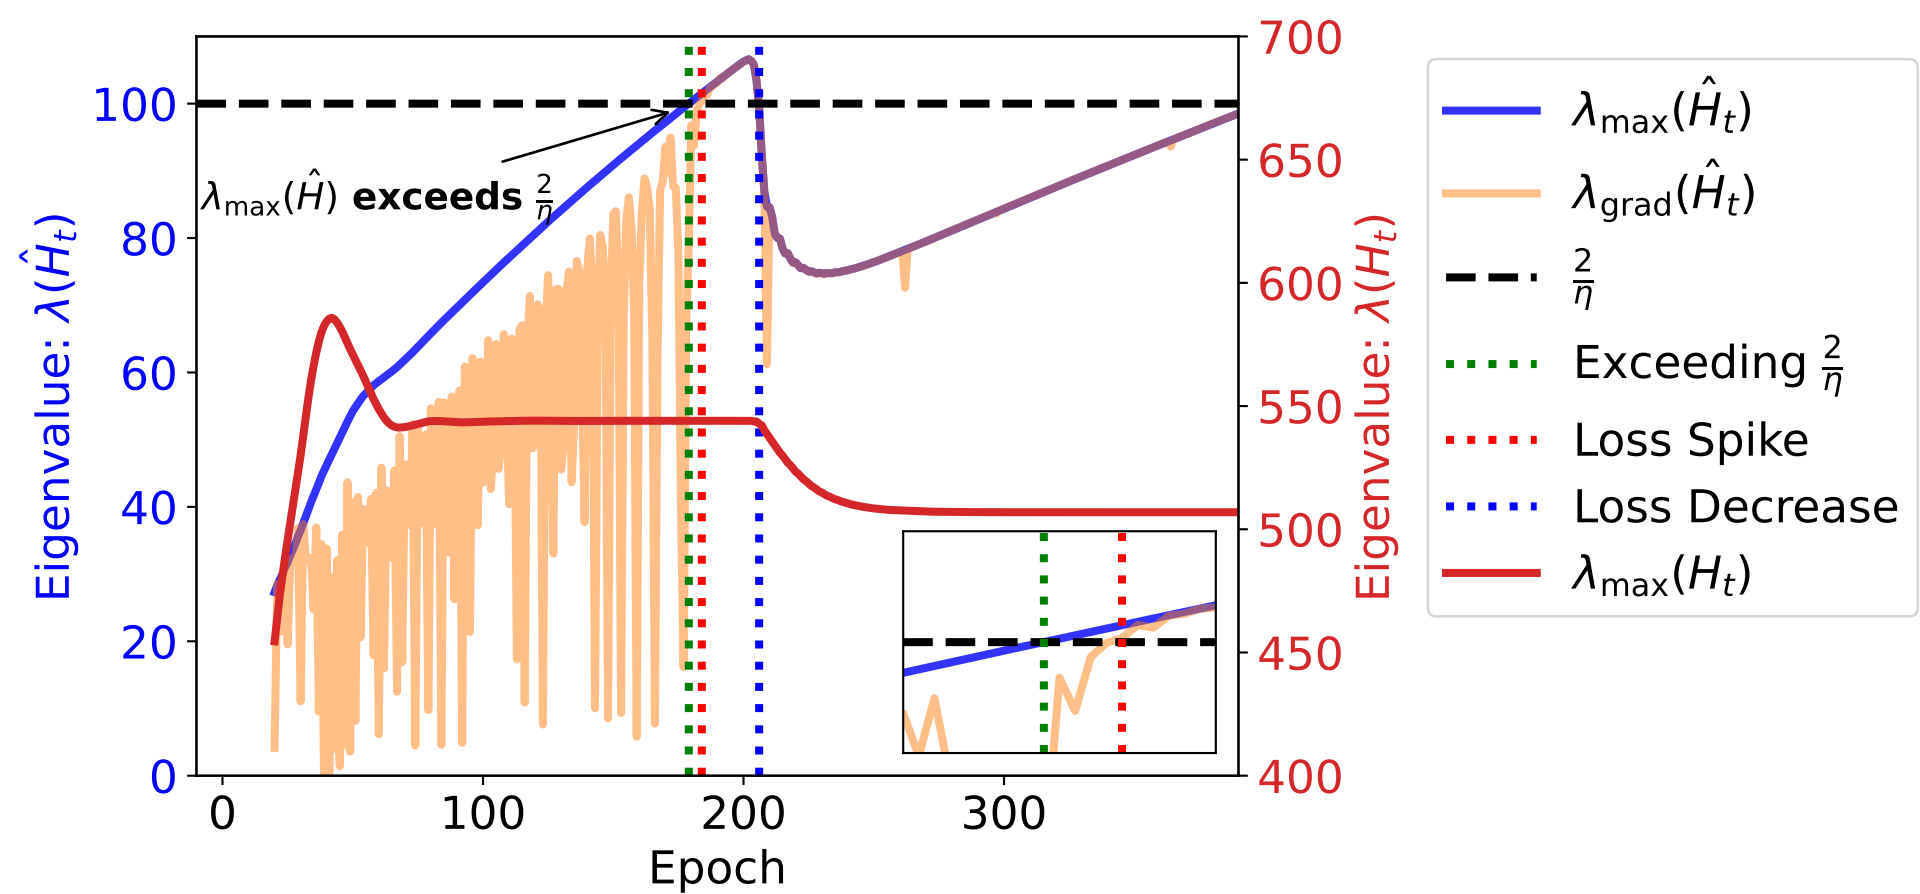

Supplement: supplementary_material [file lambda_max_no_update.pdf › Code/Adam_two_layer_net_50_dim/analysis/lambda_max_no_update.pdf]

Loss and Gradient Norm

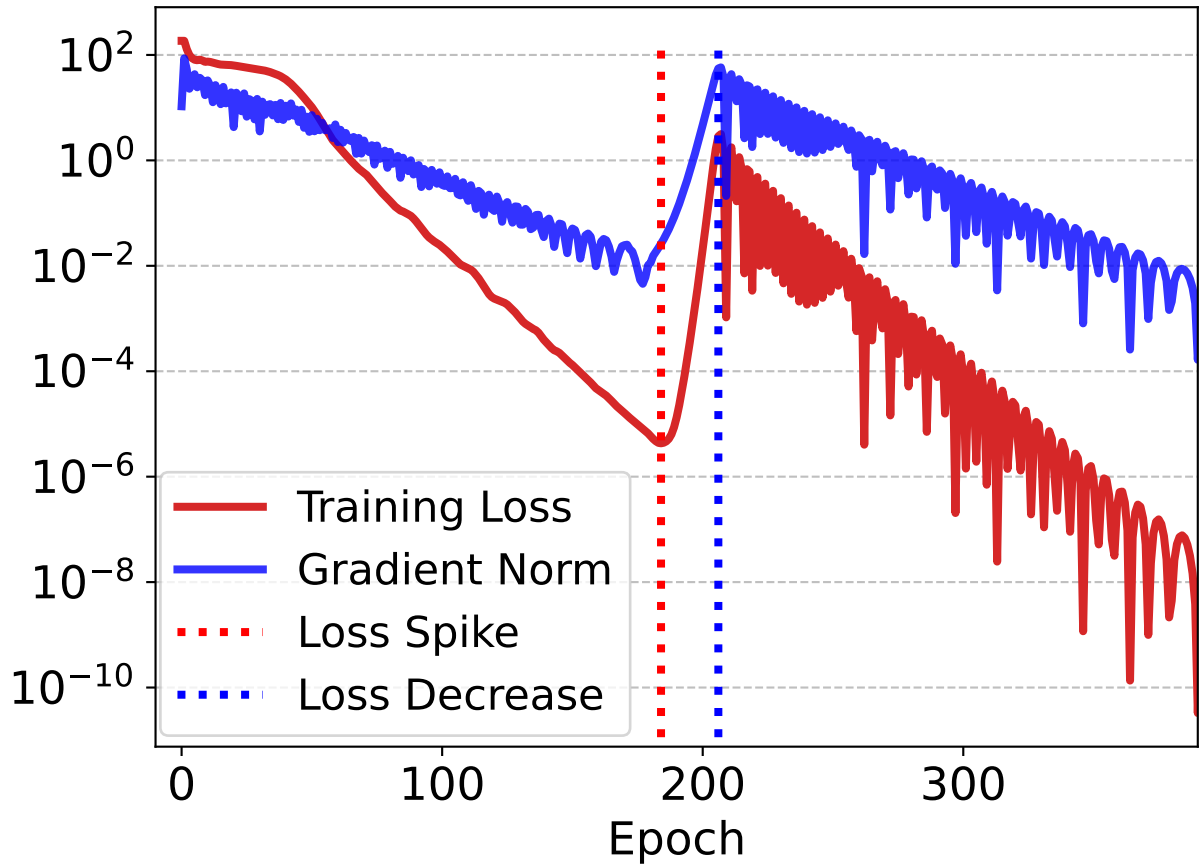

Supplement: supplementary_material [file loss.pdf › Code/Adam_two_layer_net_50_dim/analysis/loss.pdf]

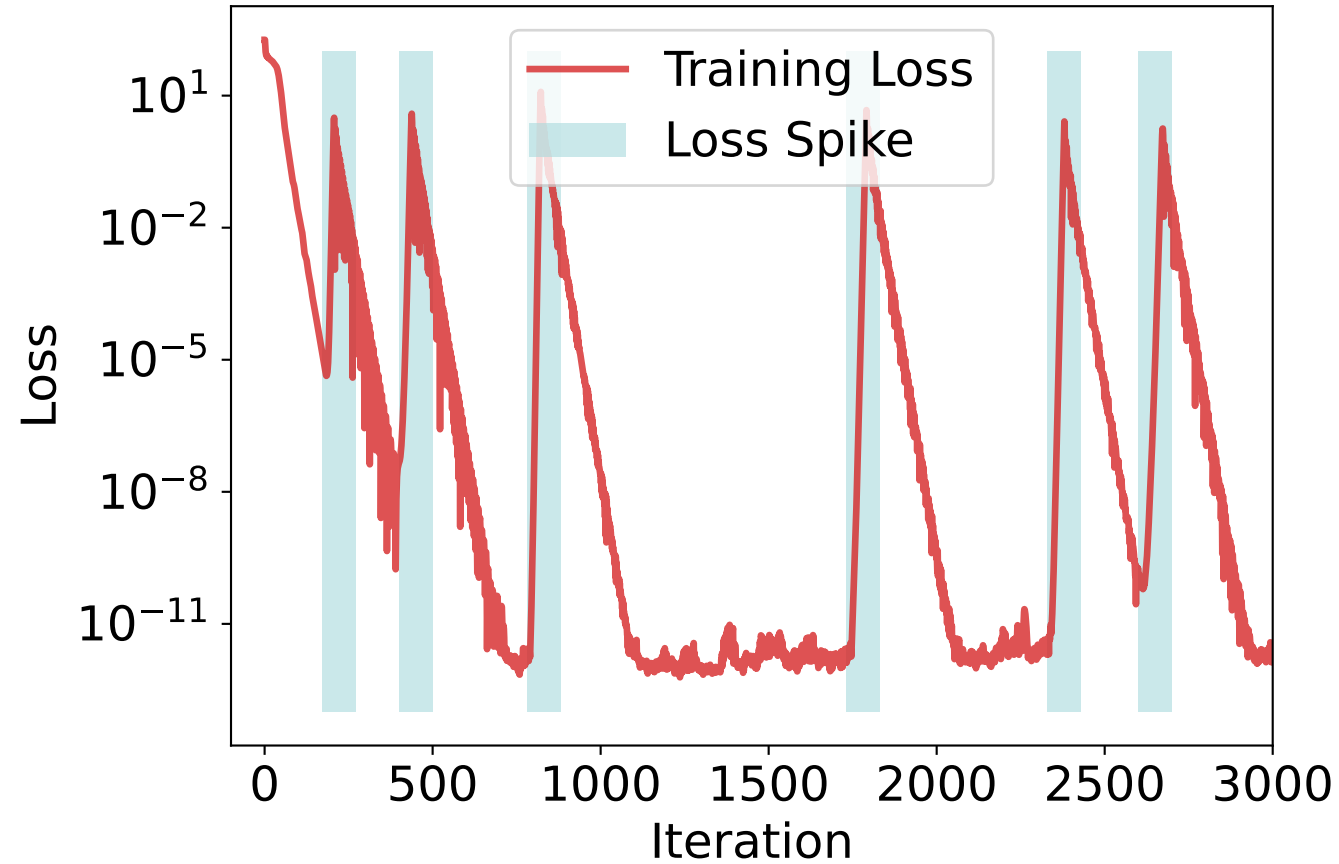

Supplement: supplementary_material [file loss_multi_spike.pdf › Code/Adam_two_layer_net_50_dim/analysis/loss_multi_spike.pdf]

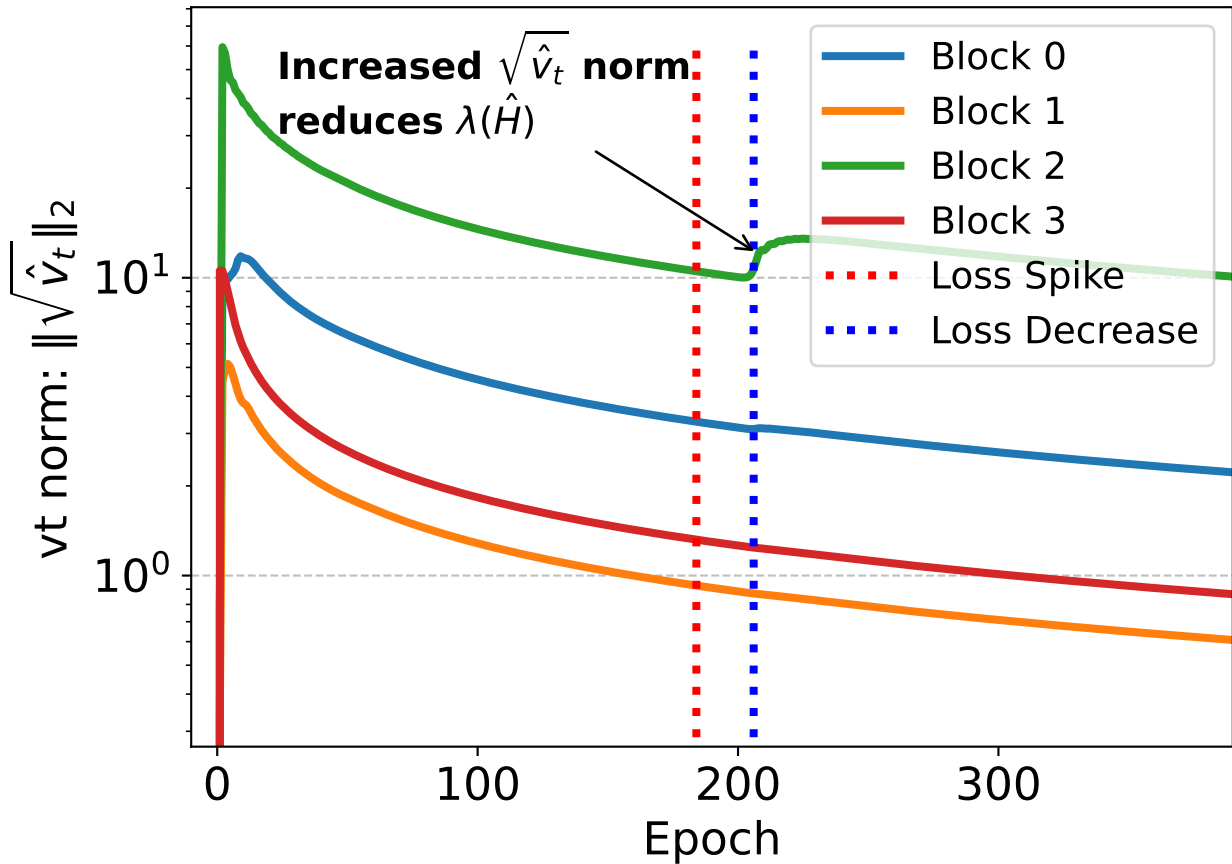

Supplement: supplementary_material [file vt_norm.pdf › Code/Adam_two_layer_net_50_dim/analysis/vt_norm.pdf]

Training Loss

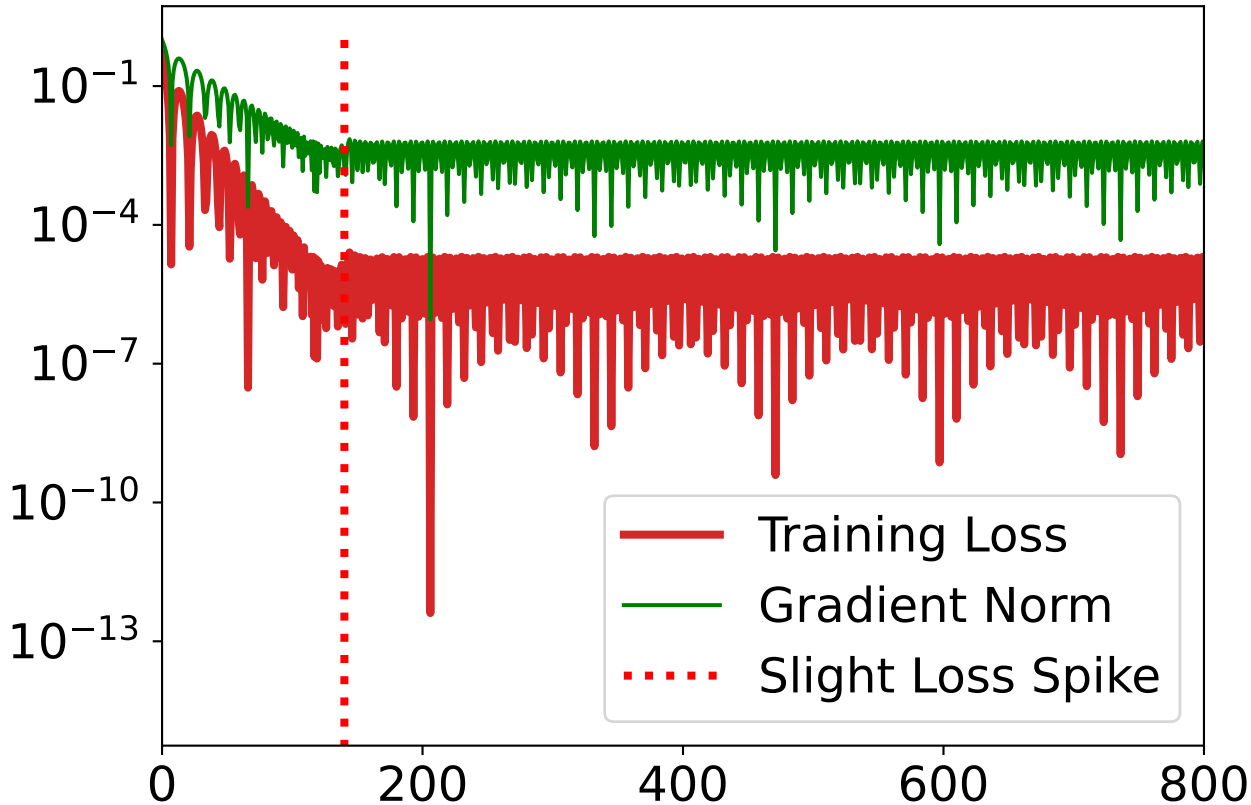

Supplement: supplementary_material [file 1d-quadratic-beta2=0.9.pdf › Code/Quadratic_Optimization/1-d-Quadratic_Optimization/1d-quadratic-beta2=0.9.pdf]

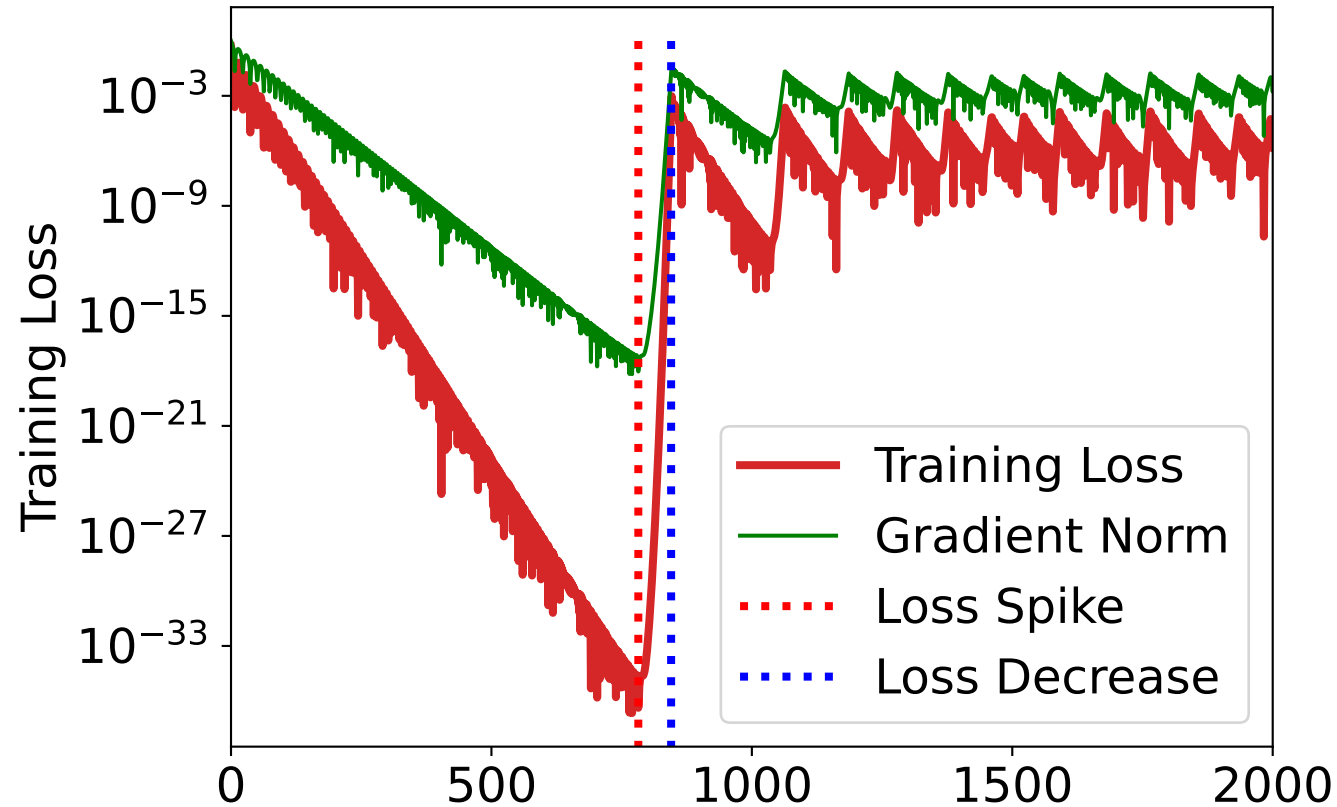

Supplement: supplementary_material [file 1d-quadratic-beta2=0.99.pdf › Code/Quadratic_Optimization/1-d-Quadratic_Optimization/1d-quadratic-beta2=0.99.pdf]

Eigenvalues

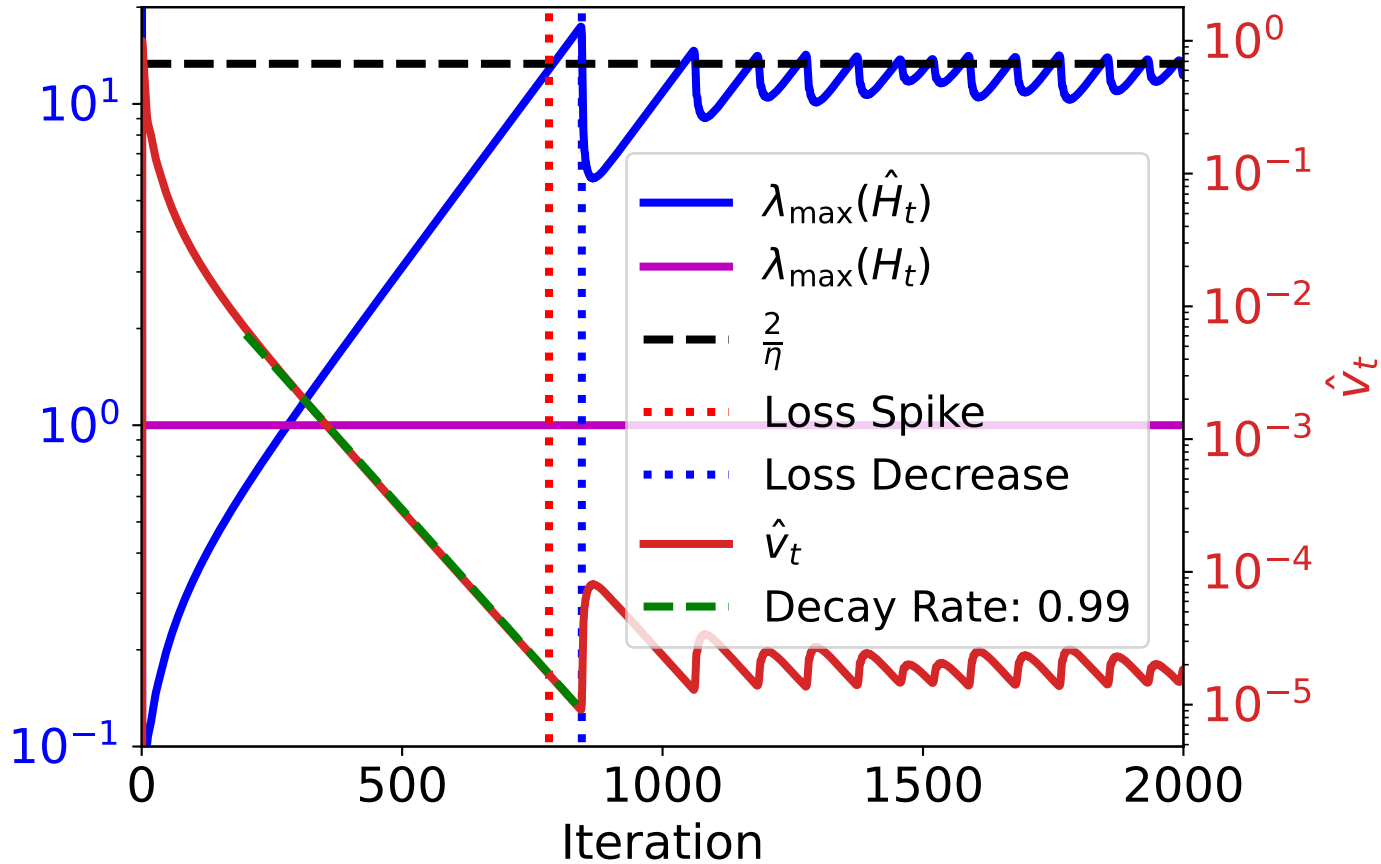

Supplement: supplementary_material [file 1d-quadratic-beta2=0.99_lambda.pdf › Code/Quadratic_Optimization/1-d-Quadratic_Optimization/1d-quadratic-beta2=0.99_lambda.pdf]

Eigenvalues

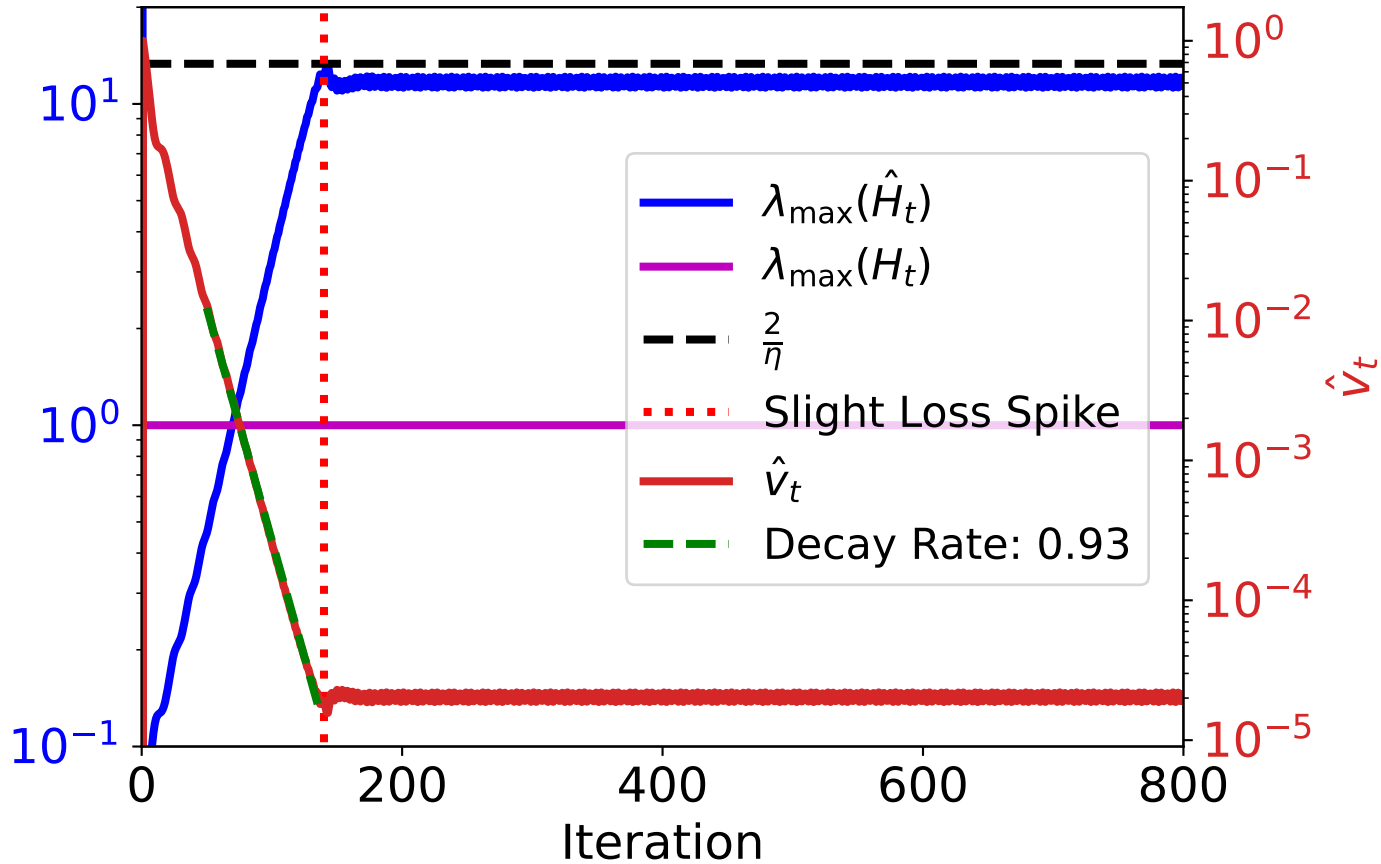

Supplement: supplementary_material [file 1d-quadratic-beta2=0.9_lambda.pdf › Code/Quadratic_Optimization/1-d-Quadratic_Optimization/1d-quadratic-beta2=0.9_lambda.pdf]

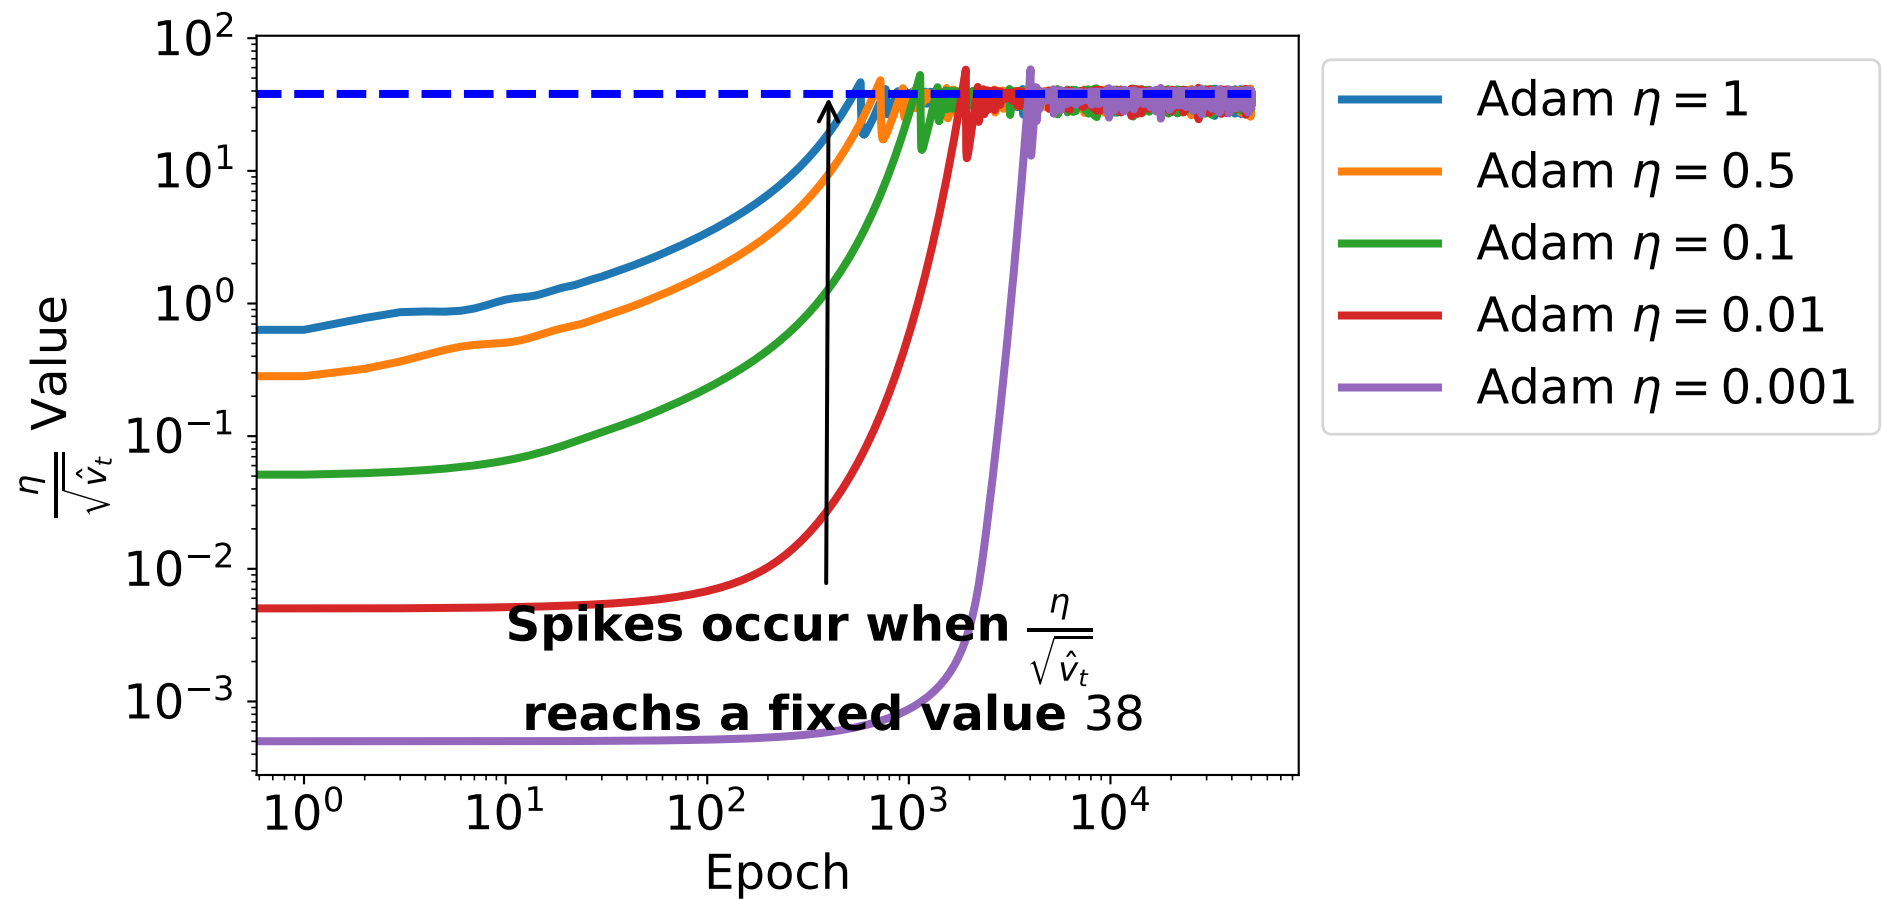

Supplement: supplementary_material [file 1d-quadratic-diff-lr-2.pdf › Code/Quadratic_Optimization/1-d-Quadratic_Optimization/1d-quadratic-diff-lr-2.pdf]

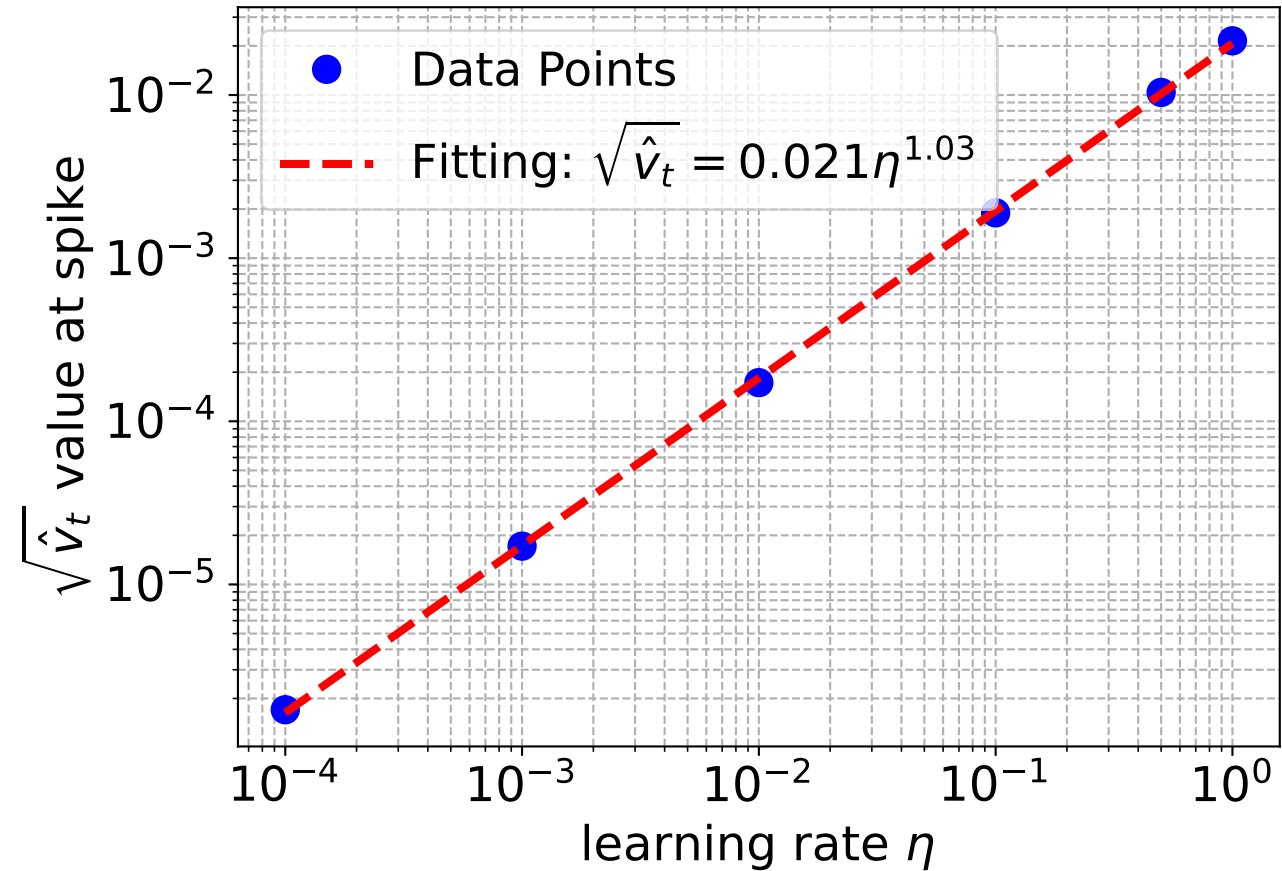

Supplement: supplementary_material [file 1d-quadratic-diff-lr.pdf › Code/Quadratic_Optimization/1-d-Quadratic_Optimization/1d-quadratic-diff-lr.pdf]

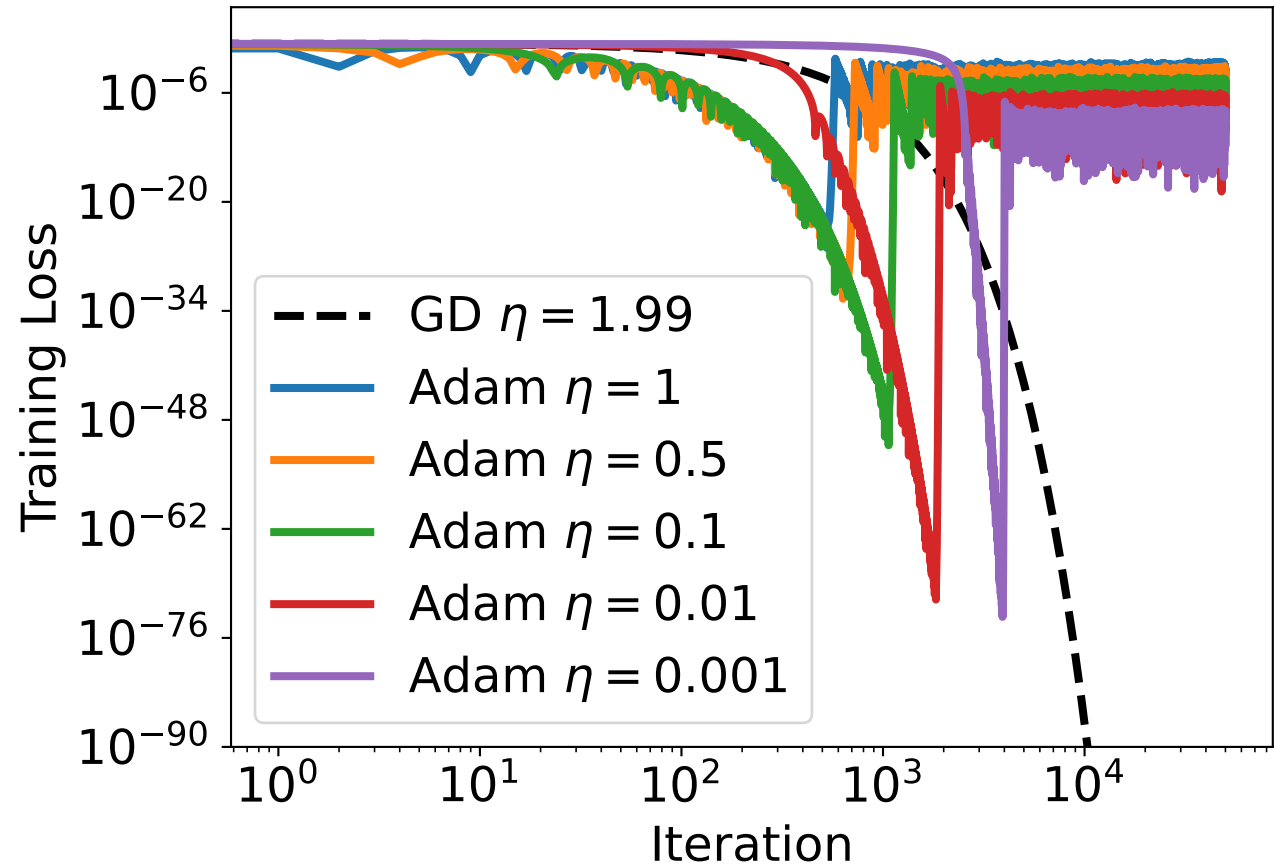

Supplement: supplementary_material [file 1d-quadratic_Adam-GD.pdf › Code/Quadratic_Optimization/1-d-Quadratic_Optimization/1d-quadratic_Adam-GD.pdf]

Training Loss

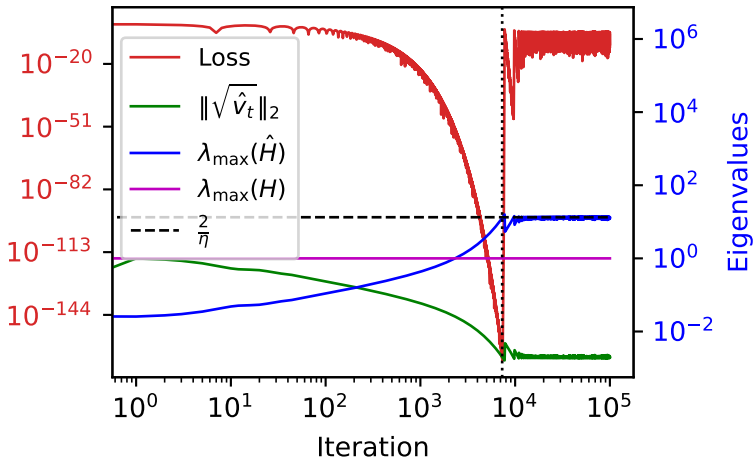

Supplement: supplementary_material [file 1d-quadratic_eta_0.15_beta1_0.95_beta2_0.999_epsilon_1e-08.pdf › Code/Quadratic_Optimization/1-d-Quadratic_Optimization/1d-quadratic_eta_0.15_beta1_0.95_beta2_0.999_epsilon_1e-08.pdf]

Training Loss

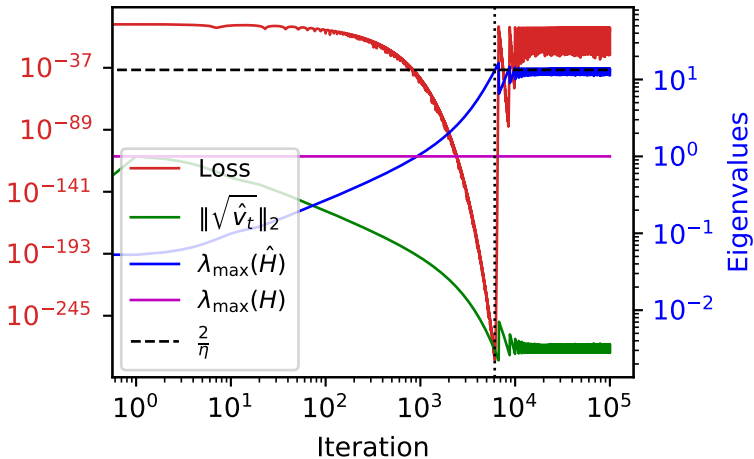

Supplement: supplementary_material [file 1d-quadratic_eta_0.15_beta1_0.9_beta2_0.999_epsilon_0.001.pdf › Code/Quadratic_Optimization/1-d-Quadratic_Optimization/1d-quadratic_eta_0.15_beta1_0.9_beta2_0.999_epsilon_0.001.pdf]

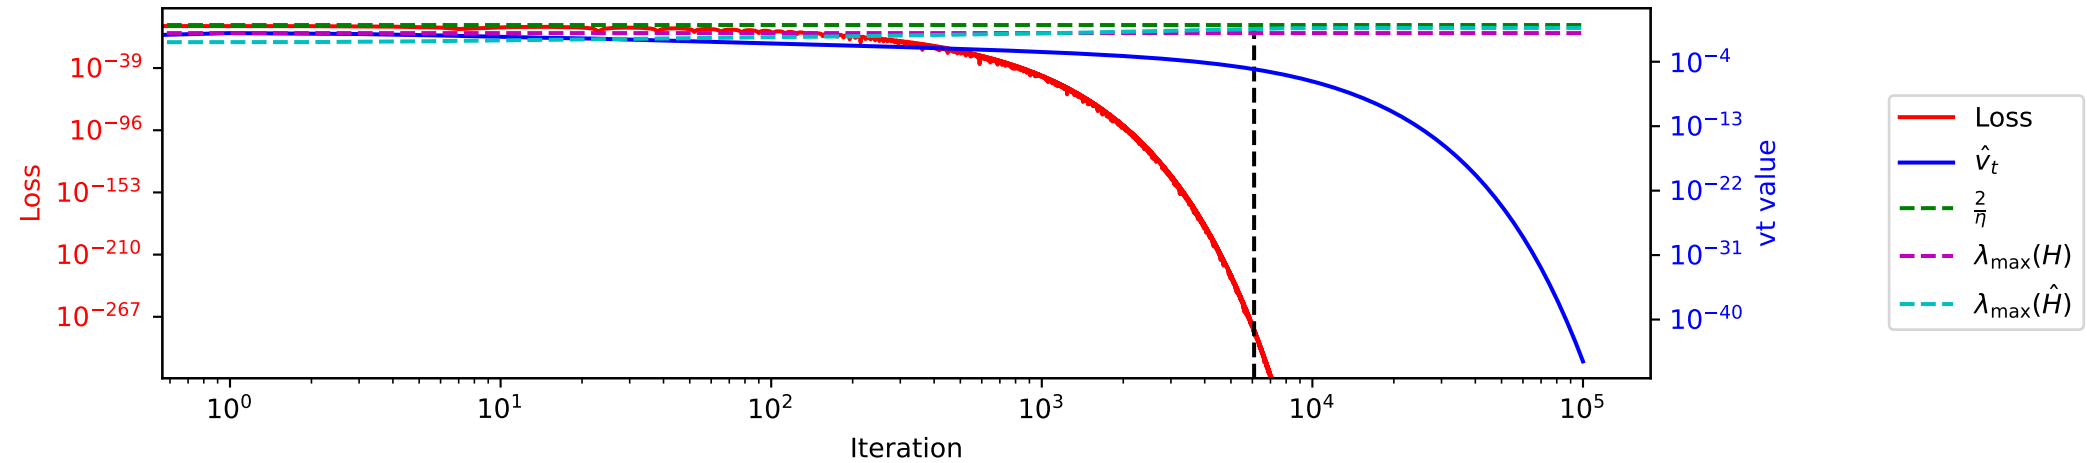

Supplement: supplementary_material [file 1d-quadratic_eta_0.15_beta1_0.9_beta2_0.999_epsilon_0.01.pdf › Code/Quadratic_Optimization/1-d-Quadratic_Optimization/1d-quadratic_eta_0.15_beta1_0.9_beta2_0.999_epsilon_0.01.pdf]

Training Loss

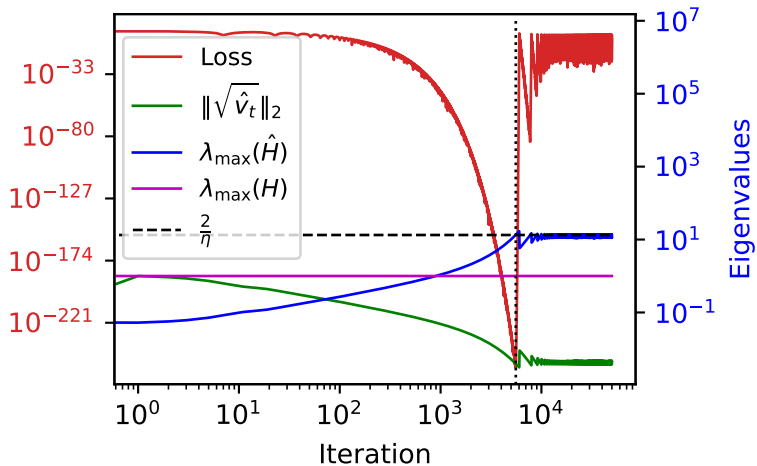

Supplement: supplementary_material [file 1d-quadratic_eta_0.15_beta1_0.9_beta2_0.999_epsilon_1e-08.pdf › Code/Quadratic_Optimization/1-d-Quadratic_Optimization/1d-quadratic_eta_0.15_beta1_0.9_beta2_0.999_epsilon_1e-08.pdf]

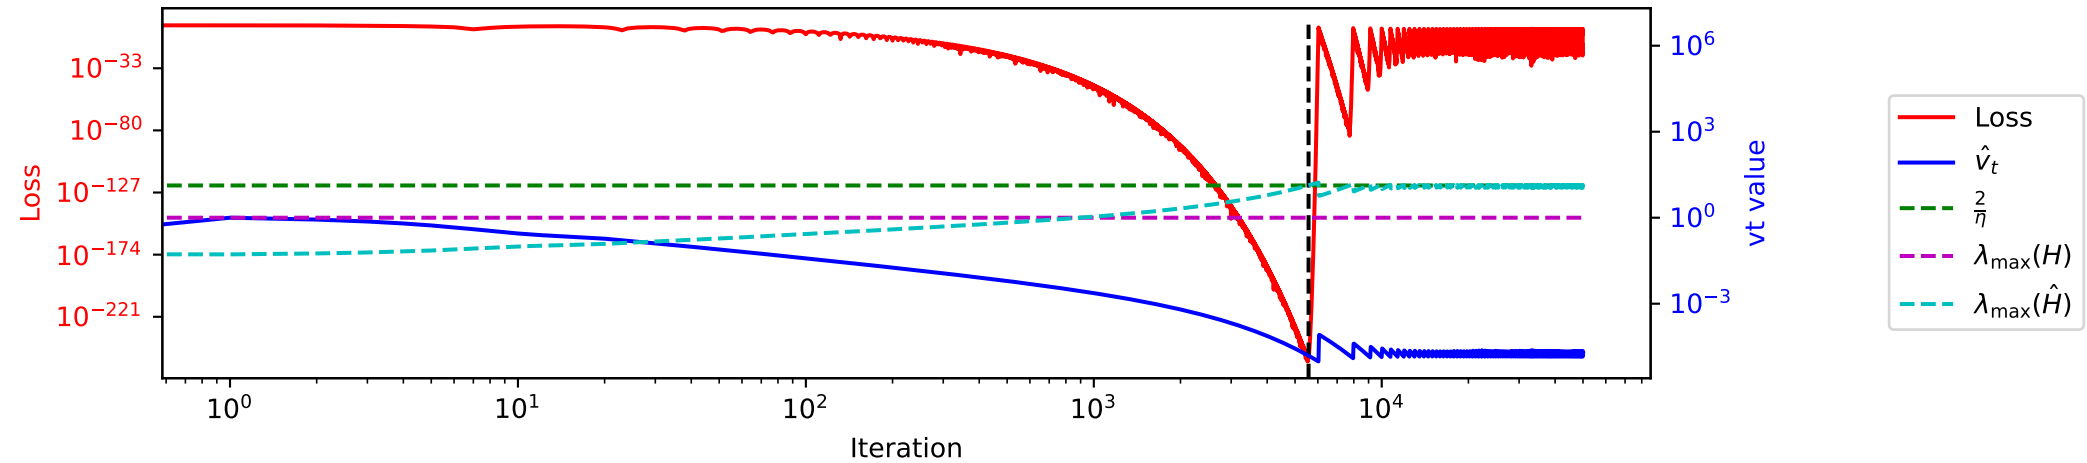

Supplement: supplementary_material [file 1d-quadratic_eta_0.15_beta1_0.9_beta2_0.999_epsilon_1e_8.pdf › Code/Quadratic_Optimization/1-d-Quadratic_Optimization/1d-quadratic_eta_0.15_beta1_0.9_beta2_0.999_epsilon_1e_8.pdf]

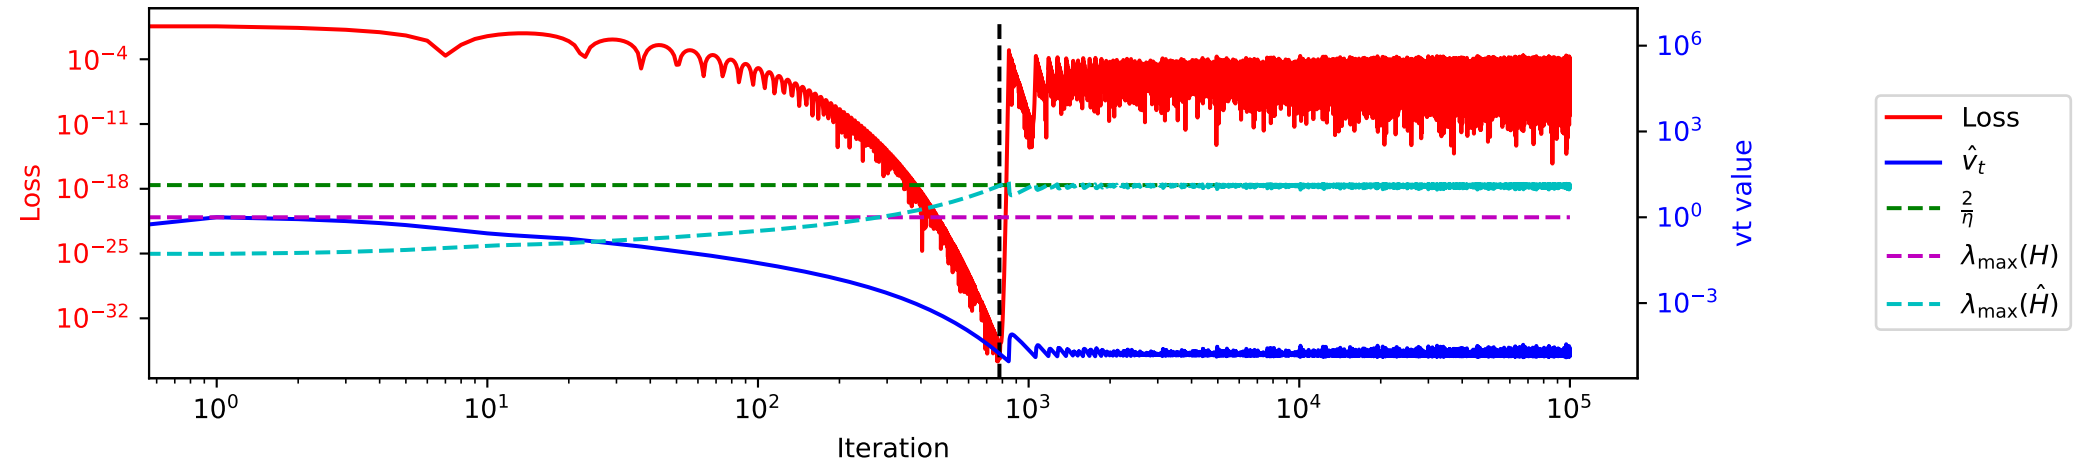

Supplement: supplementary_material [file 1d-quadratic_eta_0.15_beta1_0.9_beta2_0.99_epsilon_1e-08.pdf › Code/Quadratic_Optimization/1-d-Quadratic_Optimization/1d-quadratic_eta_0.15_beta1_0.9_beta2_0.99_epsilon_1e-08.pdf]

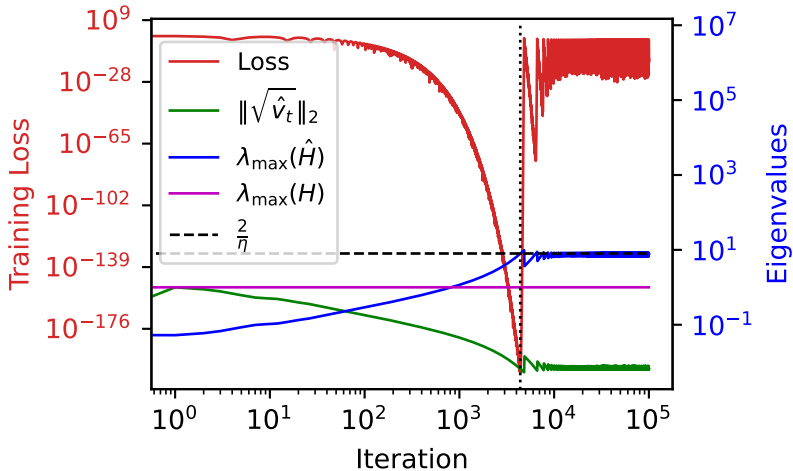

Supplement: supplementary_material [file 1d-quadratic_eta_0.25_beta1_0.9_beta2_0.999_epsilon_1e-08.pdf › Code/Quadratic_Optimization/1-d-Quadratic_Optimization/1d-quadratic_eta_0.25_beta1_0.9_beta2_0.999_epsilon_1e-08.pdf]

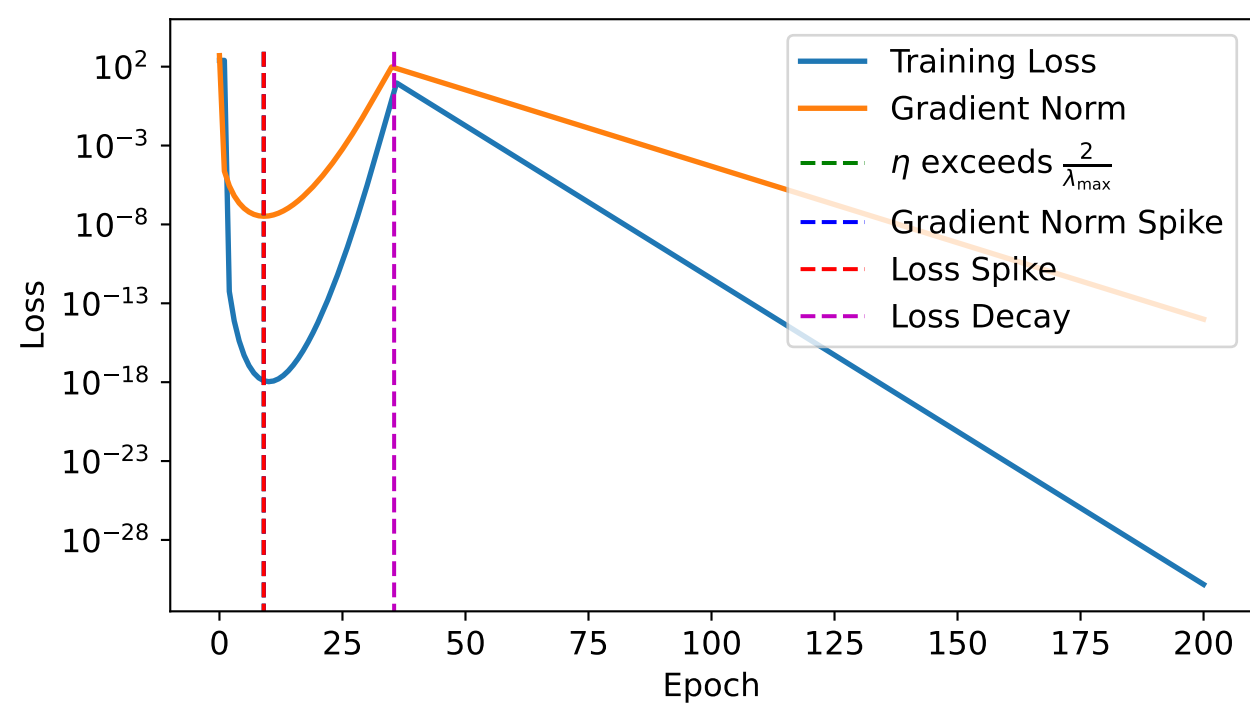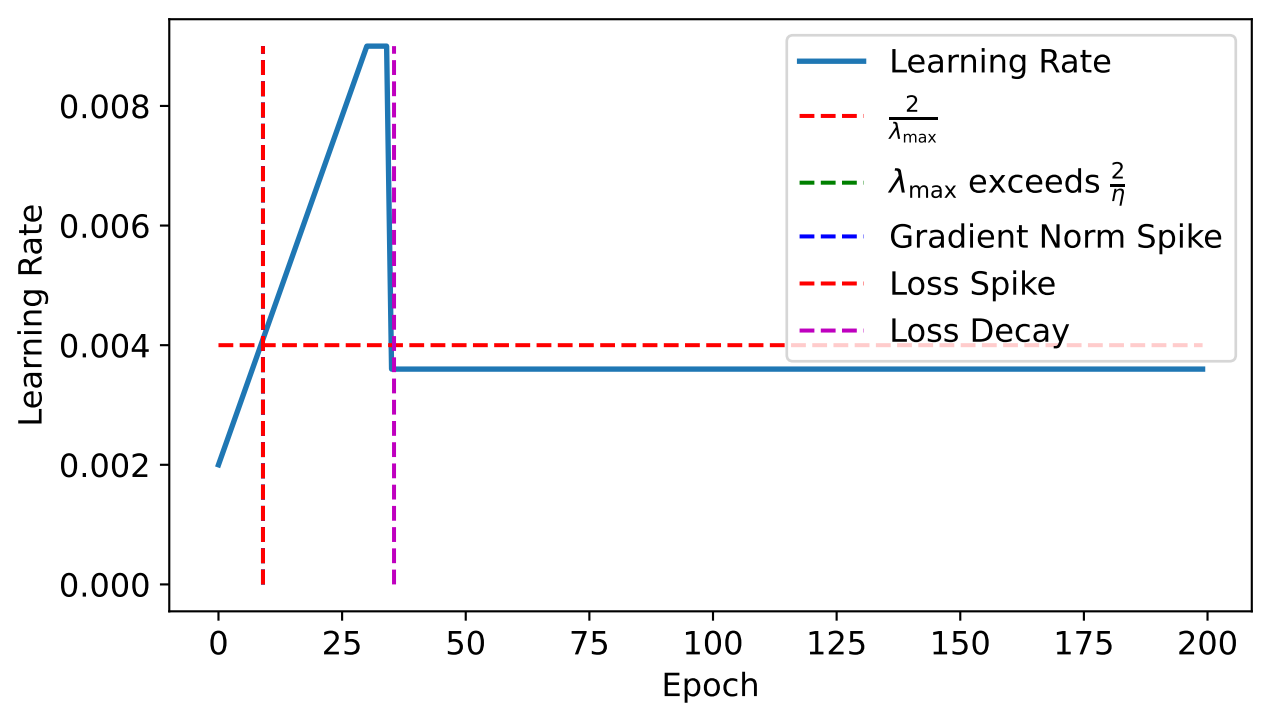

Supplement: supplementary_material [file 1d-quadratic_eta_0.1_beta1_0.9_beta2_0.99_epsilon_1e-08_loss_lr.pdf › Code/Quadratic_Optimization/2-d-Quadratic_Optimization/1d-quadratic_eta_0.1_beta1_0.9_beta2_0.99_epsilon_1e-08_loss_lr.pdf]

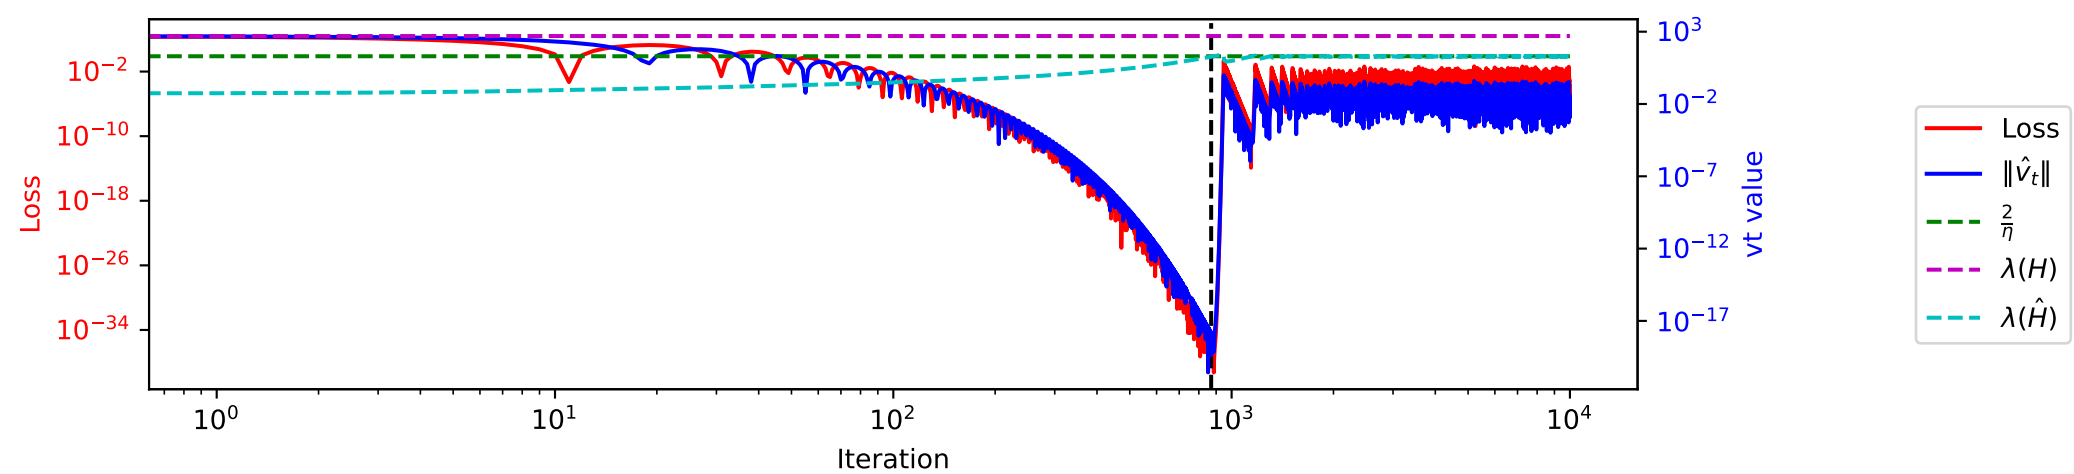

Supplement: supplementary_material [file 2d-quadratic_eta_0.1_beta1_0.9_beta2_0.99_epsilon_1e-08.pdf › Code/Quadratic_Optimization/2-d-Quadratic_Optimization/2d-quadratic_eta_0.1_beta1_0.9_beta2_0.99_epsilon_1e-08.pdf]

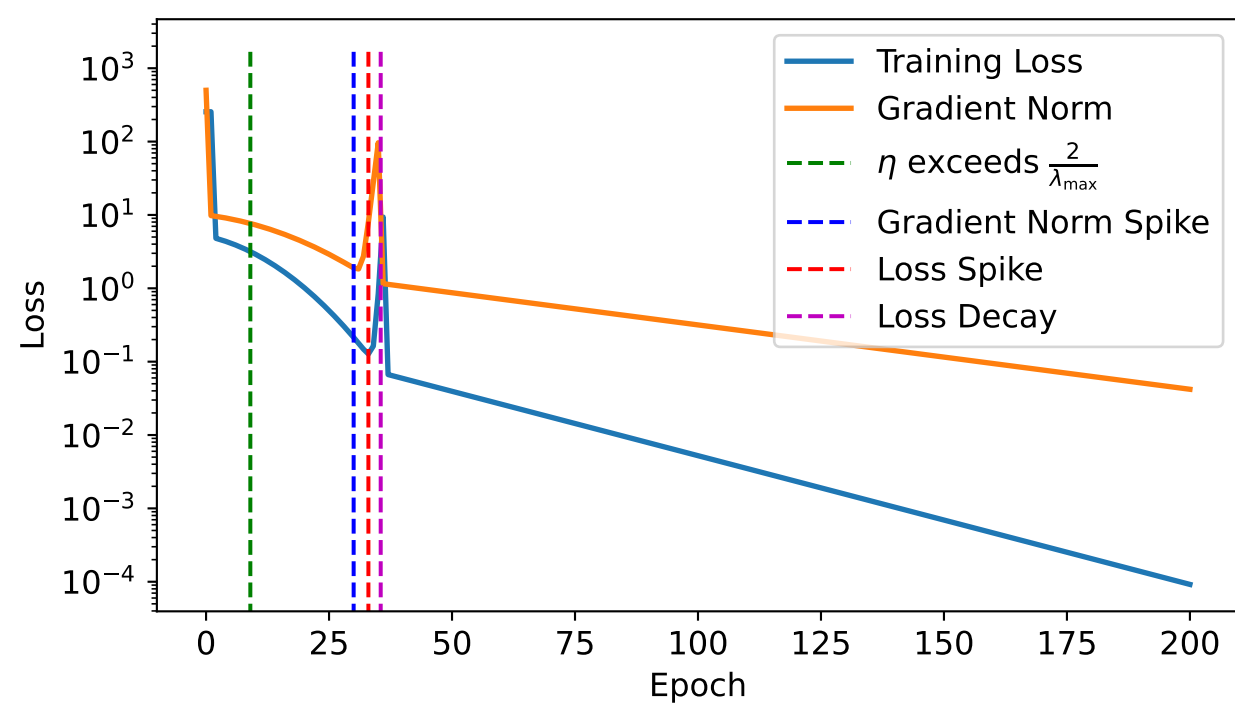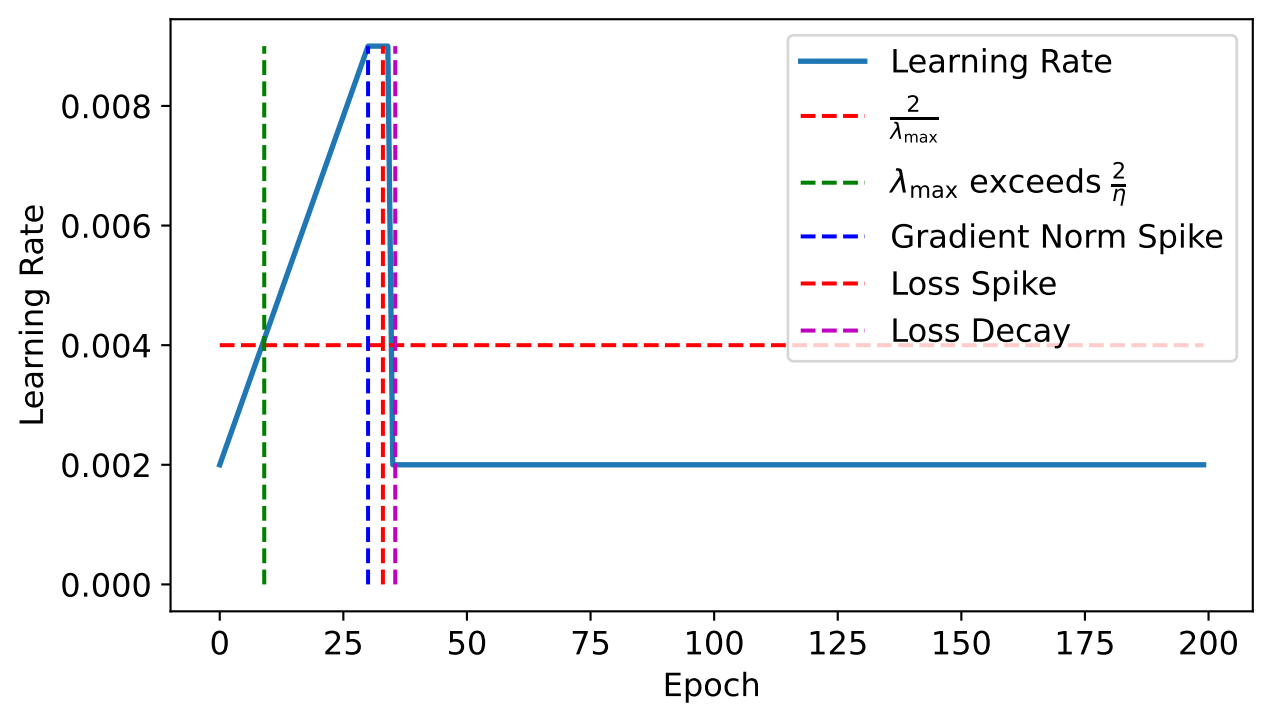

Supplement: supplementary_material [file 2d-quadratic_eta_0.1_beta1_0.9_beta2_0.99_epsilon_1e-08_loss_lr.pdf › Code/Quadratic_Optimization/2-d-Quadratic_Optimization/2d-quadratic_eta_0.1_beta1_0.9_beta2_0.99_epsilon_1e-08_loss_lr.pdf]

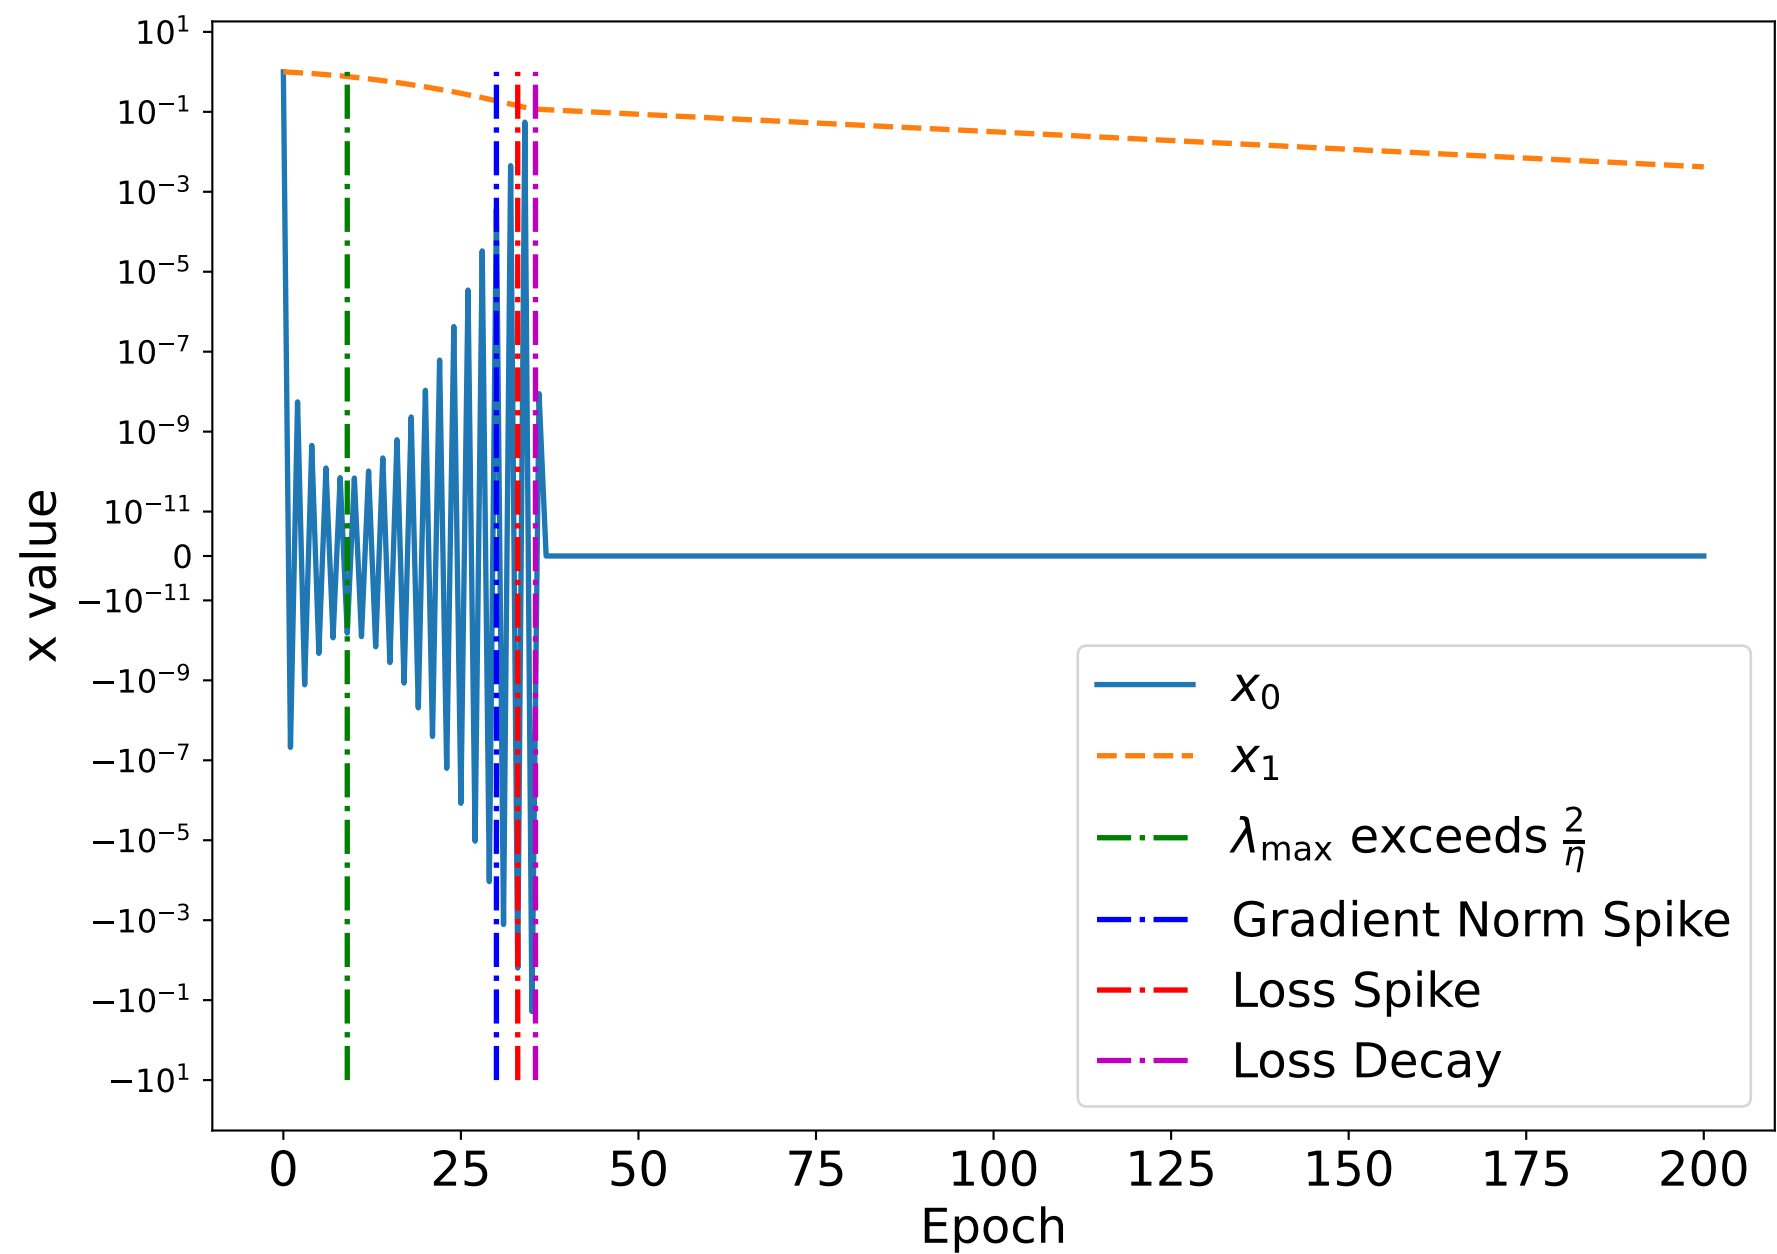

Supplement: supplementary_material [file 2d-quadratic_eta_0.1_beta1_0.9_beta2_0.99_epsilon_1e-08_x_value.pdf › Code/Quadratic_Optimization/2-d-Quadratic_Optimization/2d-quadratic_eta_0.1_beta1_0.9_beta2_0.99_epsilon_1e-08_x_value.pdf]

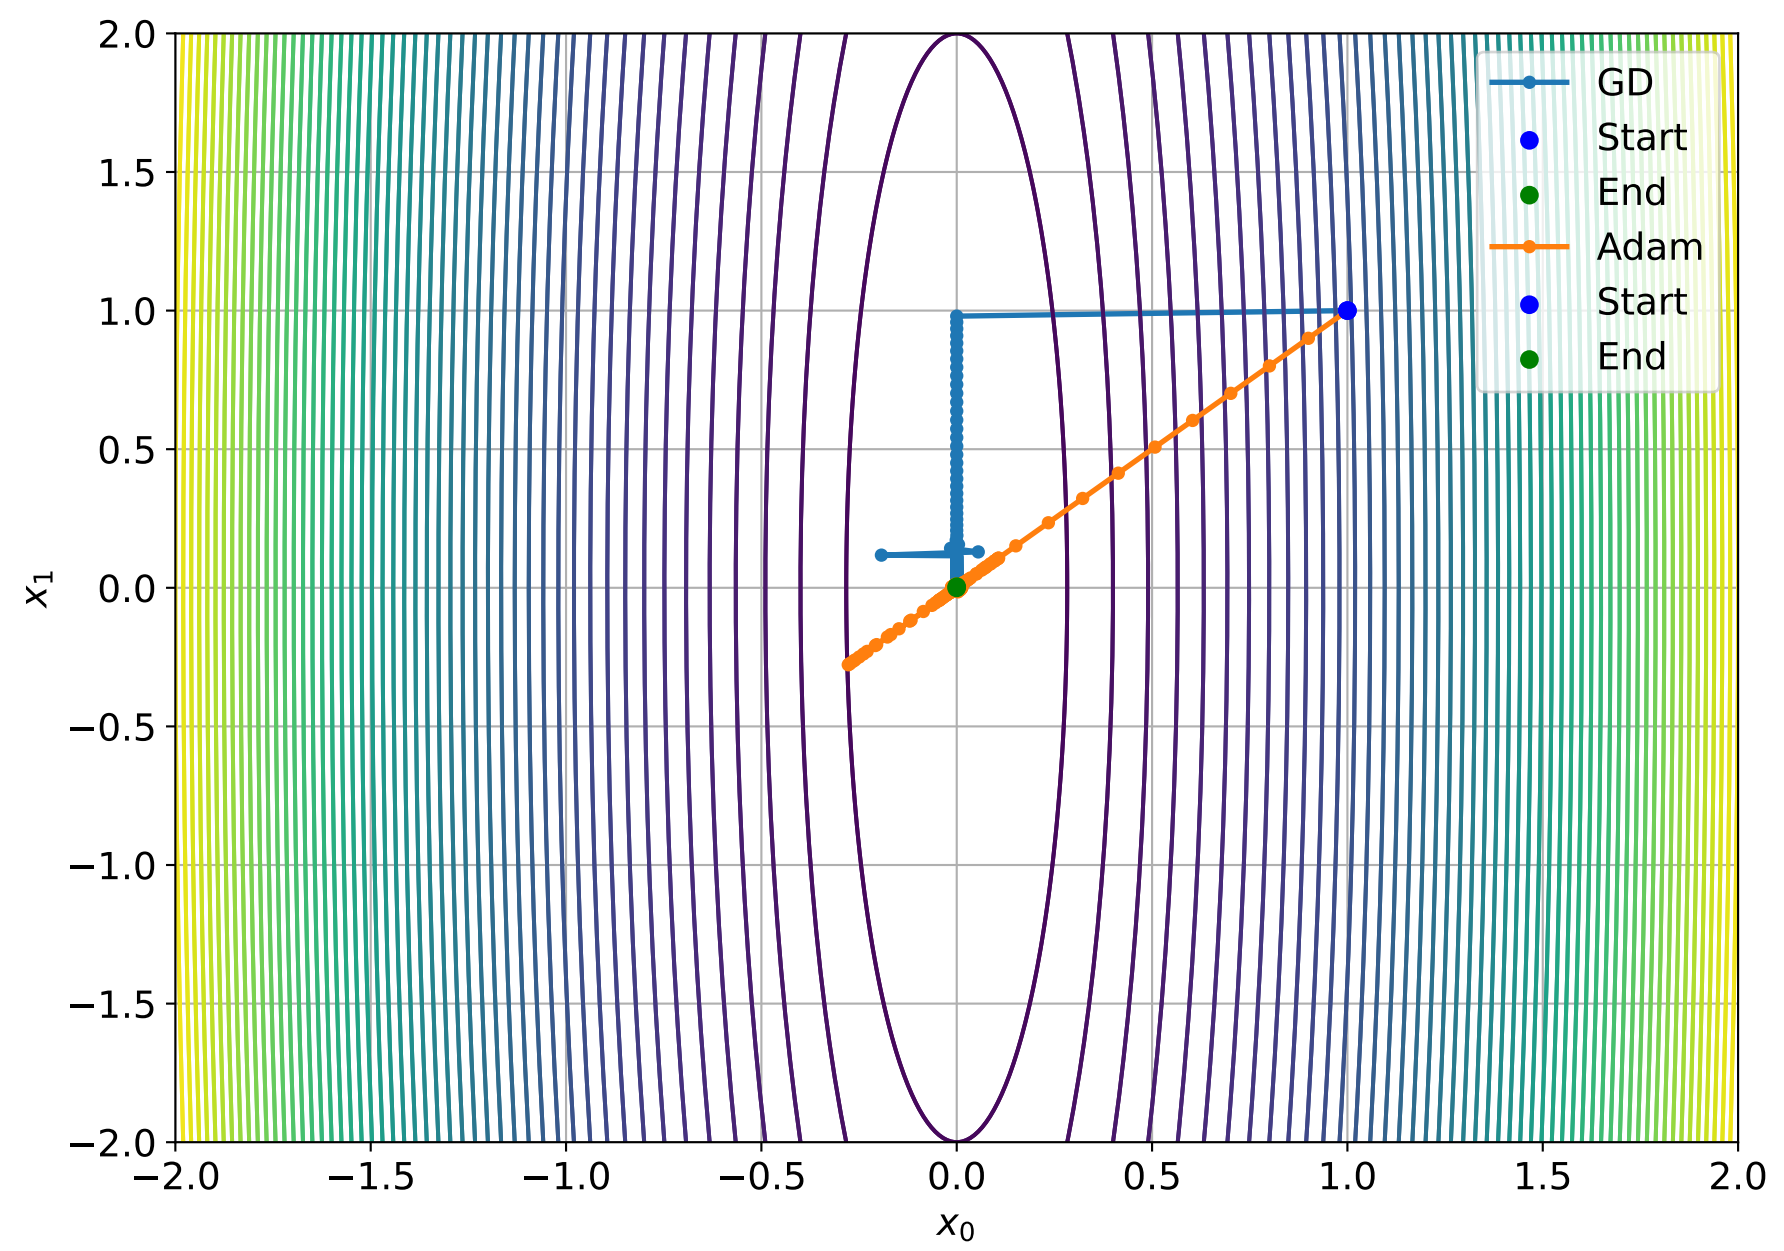

Supplement: supplementary_material [file 2d-quadratic_trajectory_eta_0.1_beta1_0.9_beta2_0.99_epsilon_1e-08.pdf › Code/Quadratic_Optimization/2-d-Quadratic_Optimization/2d-quadratic_trajectory_eta_0.1_beta1_0.9_beta2_0.99_epsilon_1e-08.pdf]

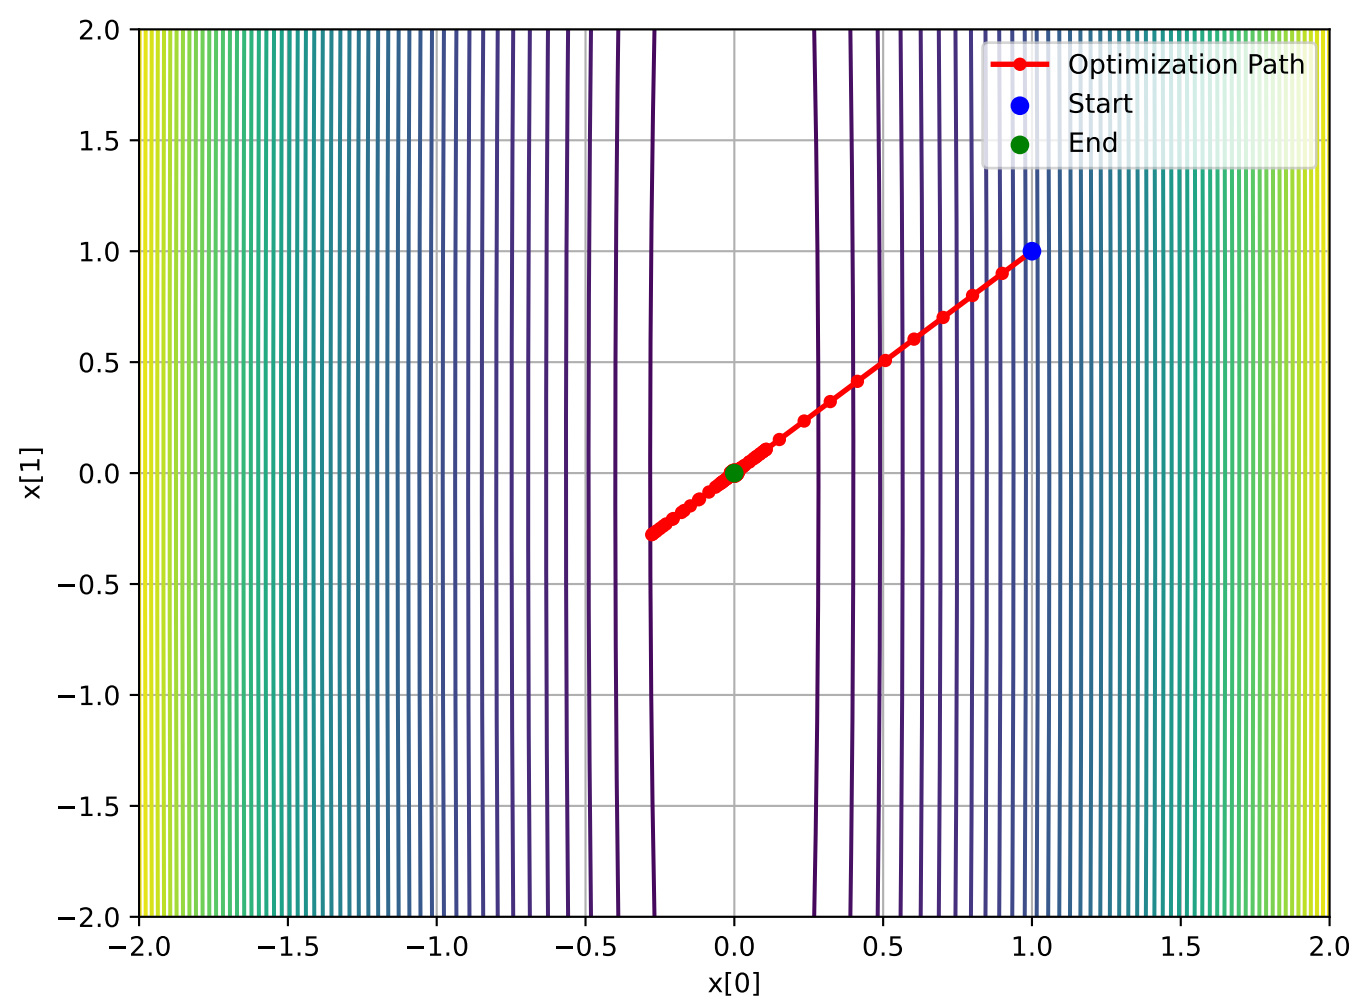

Supplement: supplementary_material [file Adam-2d-quadratic_trajectory_eta_0.1_beta1_0.9_beta2_0.99_epsilon_1e-08.pdf › Code/Quadratic_Optimization/2-d-Quadratic_Optimization/Adam-2d-quadratic_trajectory_eta_0.1_beta1_0.9_beta2_0.99_epsilon_1e-08.pdf]

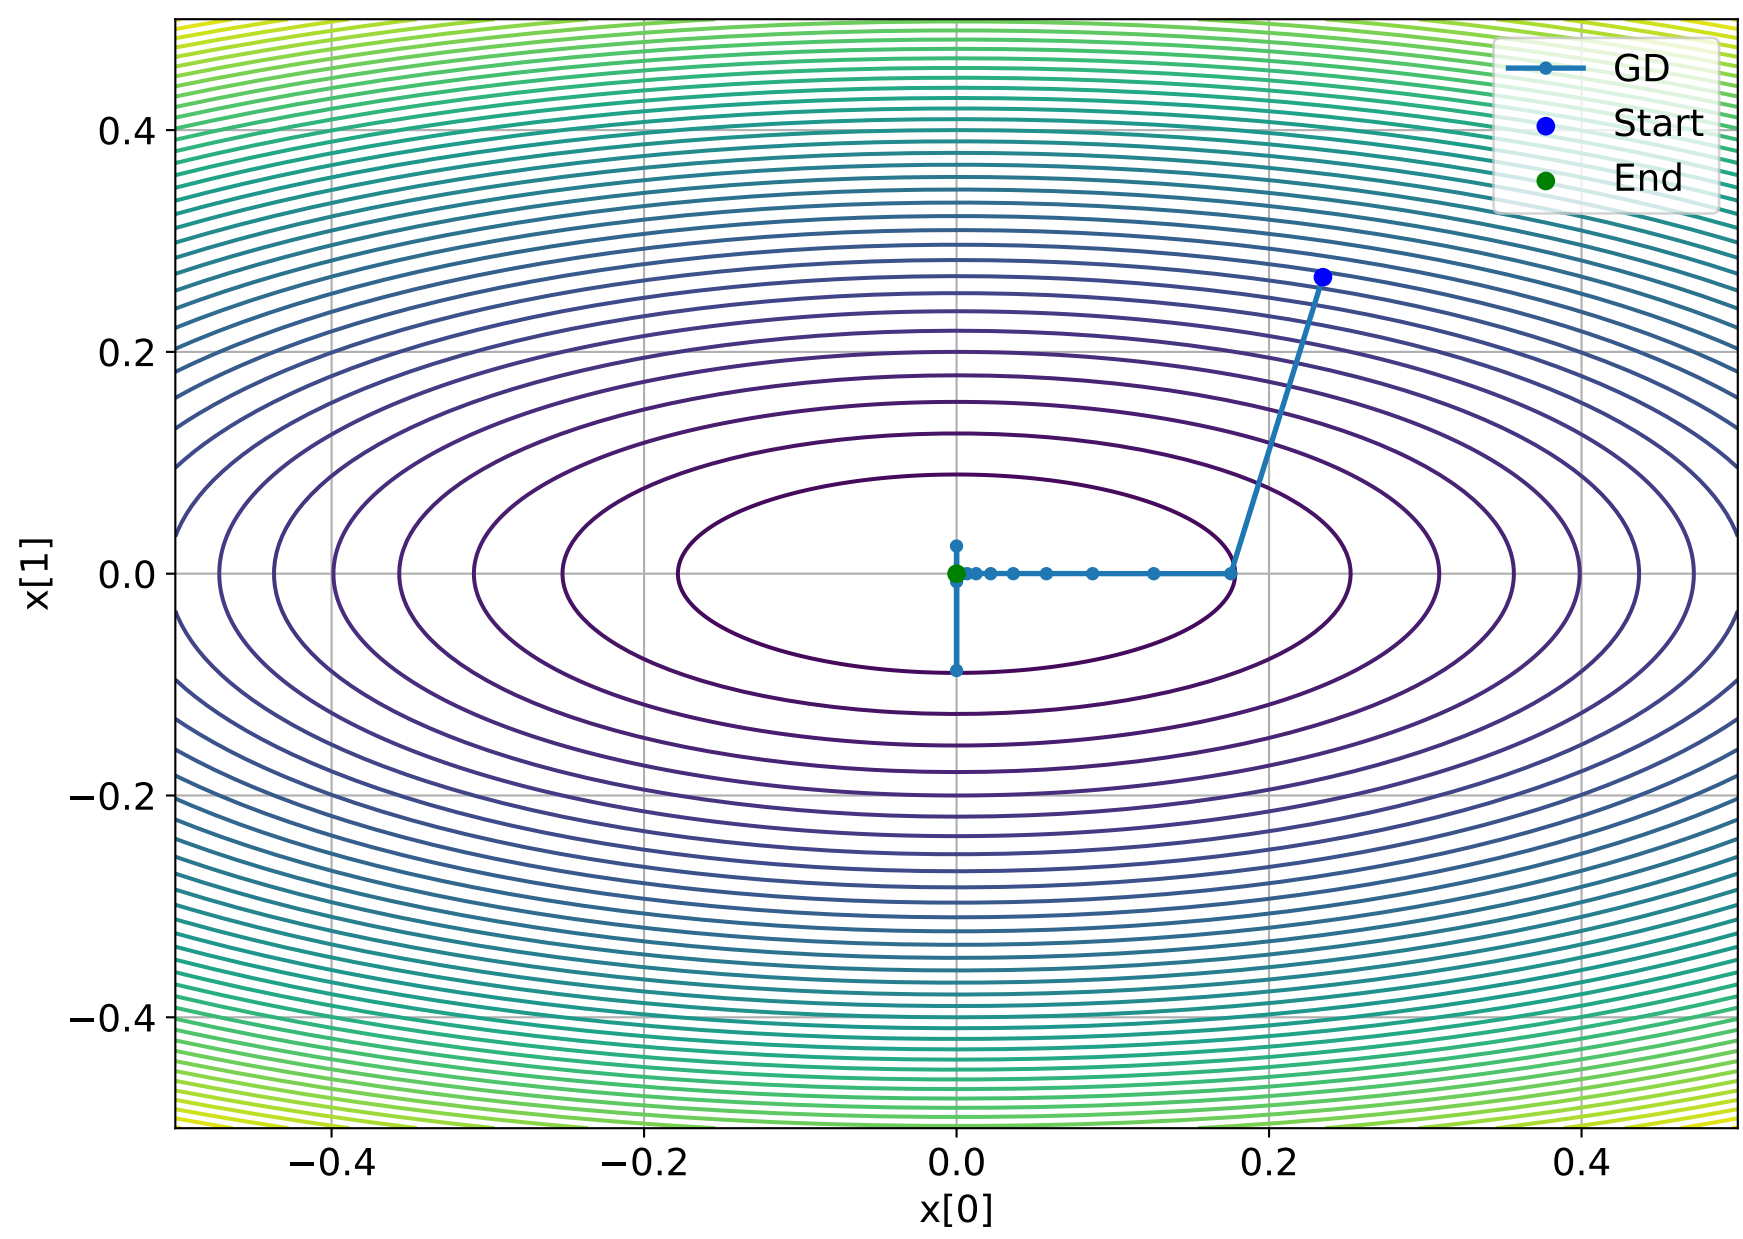

Supplement: supplementary_material [file GD-2d-quadratic_trajectory_eta_0.1_beta1_0.9_beta2_0.99_epsilon_1e-08.pdf › Code/Quadratic_Optimization/2-d-Quadratic_Optimization/GD-2d-quadratic_trajectory_eta_0.1_beta1_0.9_beta2_0.99_epsilon_1e-08.pdf]
